# Supplementary material for: Rab4A-directed endosome traffic shapes pro-inflammatory mitochondrial metabolism in T cells via mitophagy, CD98 expression, and kynurenine-sensitive mTOR activation
Source: PubMed Central journal article supplement (PMC10960037; doi:10.1038/s41467-024-46441-2), 2024-03-22
Supplement: 41467_2024_46441_MOESM1_ESM.pdf [file 41467_2024_46441_MOESM1_ESM.pdf]

## **SUPPLEMENTARY MATERIALS**

List of Abbreviations: page 2.

Supplementary Tables S1-S4: pages 3-18.

Supplementary Figures S1-S19 with Legends: pages 19-58.

Supplementary References: page 59.

## List of Abbreviations

ACLA, anticardiolipin antibodies;  
ADP, adenosine diphosphate;  
pAkt, pAkt<sup>Ser473</sup>, Akt phosphorylated at serine residue 473;  
ANA, anti-nuclear antibodies;  
Anti-ApoH, anti-apolipoprotein H  
Anti- $\beta_2$ GPI, anti- $\beta_2$  glycoprotein I antibodies;  
aPL, anti-phospholipid antibodies;  
APS, anti-phospholipid syndrome;  
B6, C57BL/6;  
mClCCP, carbonyl cyanide m-chlorophenylhydrazone;  
CMC, carboxymethyl cellulose;  
 $\Delta\psi_m$ , mitochondrial transmembrane potential;  
DAH, diffuse alveolar hemorrhage;  
DHR, dihydrorhodamine;  
DMEM, Dulbecco's modified Eagle medium;  
EGTA, ethylene glycol-bis(2-aminoethylether)-N,N,N',N'-tetraacetic acid;  
ELISA, enzyme-linked immunosorbent assay;  
ETC, electron transport chain;  
FCCP, carbonyl cyanide-4-(trifluoromethoxy)phenylhydrazone;  
HEPES, 4-(2-hydroxyethyl)-1-piperazineethanesulfonic acid;  
HRP, horseradish peroxidase;  
IFN, interferon;  
Lpr, C57BL/6.lpr mice that carry a disrupted CD95 gene;  
MHP, mitochondrial hyperpolarization;  
MTG, MitoTracker green;  
mTOR, mechanistic target of rapamycin;  
mTORC1, mTOR complex 1;  
mTORC2, mTOR complex 2;  
OD, optical density;  
OXPHOS, oxidative phosphorylation;  
PBS, phosphate buffered saline;  
P<sub>i</sub>, inorganic phosphate;  
PDBu, phorbol 12, 13-dibutyrate  
PE, phosphatidylethanolamine;  
PMSF, phenylmethanesulfonyl fluoride;  
Pristane, 2, 6, 10, 14-tetramethylpentadecane;  
PS, phosphatidylserine;  
pS6K<sup>T389</sup>, S6 ribosomal protein kinase phosphorylated at threonine residue 389;  
pS6RP, pS6RP<sup>S235/236</sup>, S6 ribosomal protein phosphorylated on serine residues 235 and 236  
RB, respiration buffer;  
RCR, respiratory control ratio;  
ROI, reactive oxygen intermediate;  
S6K, S6 ribosomal protein kinase;  
SEM, standard error of the mean;  
SDHA, succinate dehydrogenase complex flavoprotein subunit A of ETC complex II;  
SLE, systemic lupus erythematosus;  
TMB, 3,3',5,5'-tetramethylbenzidine;  
TMPD, N,N,N',N'-tetramethyl-p-phenylenediamine

**Supplementary Table S1.** Mouse strain abbreviations.

| Abbreviation                    | Mouse genotype                                    | Rab4A modification                              | CD4 <sup>Cre</sup> |
|---------------------------------|---------------------------------------------------|-------------------------------------------------|--------------------|
| B6/WT                           | C57Bl/6                                           | WT                                              |                    |
| B6/CD4 <sup>Cre</sup>           | C57Bl/6.CD4 <sup>Cre</sup>                        | WT                                              | +                  |
| B6/Rab4A <sup>Q72L</sup>        | C57Bl/6.Rab4A <sup>Q72L</sup>                     | Rab4A <sup>Q72L-FL/FL</sup>                     |                    |
| B6/Rab4A <sup>Q72L</sup> -KO    | C57Bl/6.Rab4A <sup>Q72L</sup> -CD4 <sup>Cre</sup> | Rab4A <sup>Q72L-FL/FL</sup> -CD4 <sup>Cre</sup> | +                  |
| B6.TC                           | C57Bl/6 SLE1.2.3. triple congenic                 | WT                                              |                    |
| B6.TC/CD4 <sup>Cre</sup>        | C57Bl/6 SLE1.2.3. triple congenic                 | WT                                              | +                  |
| B6.TC/Rab4A <sup>Q72L</sup>     | C57Bl/6 SLE1.2.3. triple congenic                 | Rab4A <sup>Q72L-FL/FL</sup>                     |                    |
| B6.TC/Rab4A <sup>Q72L</sup> -KO | C57Bl/6 SLE1.2.3. triple congenic                 | Rab4A <sup>Q72L-FL/FL</sup> -CD4 <sup>Cre</sup> | +                  |

**Supplementary Table S2. ANTIBODIES USED FOR FLOW CYTOMETRY**

Antibody reagents in this study were used at a 100-fold dilution.

| Antibody target               | Fluorochrome | Company        | Cat. No.   |
|-------------------------------|--------------|----------------|------------|
| CD3                           | BUV737       | BD             | 564618     |
| CD3                           | BV711        | BD             | 563123     |
| CD4                           | BUV496       | BD             | 564667     |
| CD4                           | PerCP-Cy5.5  | BD             | 550954     |
| CD8                           | APC-Cy7      | Biolegend      | 100714     |
| CD11b                         | PerCP-Cy5.5  | BioLegend      | 101228     |
| CD11b                         | BUV395       | BD             | 563553     |
| CD11c                         | BUV395       | BD             | 744180     |
| CD11c                         | AF488        | Biolegend      | 117311     |
| CD11c                         | PE-CF594     | BD             | 562464     |
| CD11c                         | BV605        | BD             | 563057     |
| CD19                          | APC-Cy7      | BD             | 557655     |
| CD19                          | AF700        | Biolegend      | 115528     |
| CD19                          | APC-R700     | BD             | 565473     |
| CD19                          | PerCP-Cy5.5  | BD             | 551001     |
| CD25                          | BUV395       | BD             | 564022     |
| CD38                          | PE-Cy7       | Biolegend      | 102718     |
| CD38                          | BV786        | BD             | 740887     |
| CD47                          | BV421        | Biolegend      | 127527     |
| CD51                          | BV650        | BD             | 740546     |
| CD61                          | BV510        | BD             | 740117     |
| CD68                          | PE-Cy7       | Biolegend      | 137016     |
| CD71                          | PE-Cy7       | Biolegend      | 113812     |
| CD98                          | PE           | Invitrogen     | 12-0981-83 |
| CD152                         | PE-Dazzle594 | Biolegend      | 106318     |
| D2DR                          | FITC         | Alomone        | ADR-002-F  |
| DRD2                          | Alexa647     | Santa Cruz     | SC-5303    |
| GLUT1                         | AF700        | R&D            | FAB1418N   |
| GLUT4                         | AF647        | R&D            | FAB86541R  |
| SERT                          | FITC         | Alomone        | AMT-004-F  |
| CCR4                          | PE-Cy7       | Biolegend      | 131214     |
| CCR6                          | AF647        | BD             | 557976     |
| Gr1                           | PE-CF594     | BD             | 562700     |
| FoxP3                         | PerCP-Cy5.5  | eBioscience    | 45-5773-82 |
| Helios                        | AF647        | Biolegend      | 137218     |
| IFNy                          | AF647        | Biolegend      | 505814     |
| IL4                           | PE-Cy7       | Biolegend      | 504118     |
| IL9                           | PerCP-Cy5.5  | Biolegend      | 514112     |
| IL17a                         | PE/Dazzle594 | Biolegend      | 506938     |
| IL17a                         | AF488        | Biolegend      | 506910     |
| IL21                          | PE           | eBioscience    | 12-7213-82 |
| MTG                           | 516nm        | Invitrogen     | M7514      |
| pAKT                          | PE           | BD             | 560378     |
| pS6RP                         | AF488        | Cell Signaling | 4803S      |
| TMRM                          | 585nm        | Invitrogen     | M20036     |
| FC block                      |              | BD             | 553142     |
| FixPerm concentrate (10x)     |              | eBioscience    | 00-5123-43 |
| Fix Perm diluent              |              | eBioscience    | 00-5223-56 |
| Permeabilization buffer (10x) |              | eBioscience    | 00-8333-56 |



## Supplementary Table S2, continued.

| Antibody target | Fluorochrome    | Company     | Catalogue No |
|-----------------|-----------------|-------------|--------------|
| CD273/PD-L2     | BUV563          | BD          | 741431       |
| TIGIT           | BV421           | BD          | 749781       |
| PD-1            | PE-Dazzle 594   | Biolegend   | 135228       |
| T-bet           | eFluor 450      | eBioscience | 48-5825-82   |
| Eomes           | PerCP-eFluor710 | eBioscience | 46-4875-82   |

  

| Isotype controls | Fluorochrome         | Company   | Catalogue No |
|------------------|----------------------|-----------|--------------|
| Hamster IgG1     | BV605                | BD        | 563054       |
| Hamster IgG1     | BV510                | BD        | 563197       |
| Rat IgG1         | BV650 °              | BD        | 563848       |
| Hamster IgG1     | BV711                | BD        | 563128       |
| Rat IgG2a        | BV786                | BD        | 563335       |
| Mouse IgG1       | PE                   | BD        | 556650       |
| Rat IgG2a        | Brilliant Violet 421 | Biolegend | 400535       |
| Mouse IgG2       | Alexa Fluor 647      | Biolegend | 400234       |

**Supplementary Table S3. ANTIBODIES USED FOR WESTERN BLOT**

| Primary antibody/Clone | Species/Isotype         | Dilution | Manufacturer            | Catalog number |
|------------------------|-------------------------|----------|-------------------------|----------------|
| 4EBP1                  | Rabbit IgG              | 1/1000   | Cell Signaling          | 9644           |
| p4EBP1                 | Rabbit IgG              | 1/1000   | Cell Signaling          | 2855           |
| Actin                  | Mouse IgG1κ             | 1/10000  | Millipore Sigma         | MAB1501        |
| AKT                    | Rabbit IgG              | 1/1000   | Cell Signaling          | 4685           |
| pAKT                   | Rabbit IgG              | 1/1000   | Cell Signaling          | 4058S          |
| Smooth muscle actin    | mouse IgG2a             | 1/50     | Dako                    | M0851          |
| β-Catenin              | mouse IgG1              | 1/1000   | BD Biosciences          | 610154         |
| BrdU                   | mouse IgG1              | 1/20     | DSHB                    | G3G4           |
| CD4                    | Rabbit IgG              | 1/1000   | Santa Cruz              | sc-7219        |
| CD98                   | Rabbit IgG              | 1/1000   | ThermoFisher Scientific | PA5-96401      |
| CRE                    | Rabbit IgG              | 1/10000  | Millipore Sigma         | 69050-3        |
| DRP1                   | Rabbit IgG              | 1/1000   | Cell Signaling          | 8570           |
| pDRP1                  | Rabbit IgG              | 1/1000   | Cell Signaling          | 4494           |
| Ecad                   | mouse                   | 1/250    | BD Biosciences          | 610182         |
| FKBP12                 | mouse IgG1              | 1/1000   | Fisher Scientific       | BDB610808      |
| HNF4                   | mouse IgG2a             | 1/300    | R&D Systems             | PP-H1415-OO    |
| Ki67                   | mouse IgG1              | 1/250    | BD Biosciences          | 556003         |
| LAT1                   | Rabbit IgG              | 1/1000   | ThermoFisher Scientific | PA5-91842      |
| mLST8                  | Rabbit IgG              | 1/1000   | Cell Signaling          | 3274           |
| mTOR                   | Rabbit IgG              | 1/1000   | Cell Signaling          | 2983           |
| Muc1                   | hamster                 | 1/500    | Neomarkers              | HM-1630-P      |
| P.H3                   | Rabbit IgG              | 1/100    | Cell Signaling          | 9701           |
| pMTOR                  | Rabbit IgG              | 1/1000   | Cell Signaling          | 2971           |
| Rab4A                  | Rabbit IgG              | 1/1000   | Abcam                   | ab108974       |
| Rab5A                  | Rabbit IgG              | 1/1000   | ThermoFisher Scientific | 11947-1-AP     |
| Rictor                 | Rabbit IgG              | 1/1000   | Cell Signaling          | 2114           |
| S6K                    | Mouse monoclonal IgG1 κ | 1/1000   | Santa Cruz              | sc-8416        |
| pS6K                   | Mouse monoclonal IgG1 κ | 1/1000   | Santa Cruz              | sc-8418        |
| Sox9                   | Rabbit IgG              | 1/500    | Chemicon                | AB5535         |
| TSC1                   | Rabbit IgG              | 1/1000   | Cell Signaling          | 4906           |
| Tubulin                | Rabbit IgG              | 1/1000   | Cell Signaling          | 2128           |
| YFP                    | goat                    | 1/250    | Abcam                   | ab6673         |

| Secondary antibodies                                                                           | Dilution | Manufacturer           | Catalog number |
|------------------------------------------------------------------------------------------------|----------|------------------------|----------------|
| Peroxidase-conjugated AffiniPure Goat Anti-Mouse IgG (H+L)                                     | 1/10000  | Jackson ImmunoResearch | 115-035-146    |
| Anti-Rabbit IgG, peroxidase-linked species-specific F(ab') <sub>2</sub> fragment (from donkey) | 1/10000  | Fisher Scientific      | 45-000-683     |

**Supplementary Table S4.** List of unique metabolites detected by a single 15-min targeted liquid chromatography–tandem mass spectrometry (LC–MS/MS) acquisition with a 3-ms dwell time and a 1.55-s duty cycle time. When available, KEGG and HMDB codes are listed for each compound.

| Compounds                                                             | KEGG codes | HMDB codes  |
|-----------------------------------------------------------------------|------------|-------------|
| 1,3-diphosphatidylglycerate                                           | C00236     | HMDB0001270 |
| 10-hydroxydecanoic acid                                               | C02774     | HMDB0000672 |
| 11-cis-eicosenoate                                                    | C04742     | HMDB0003876 |
| 12,13-epoxy-9-hydroperoxy-10e-octadecenoate                           | C14832     | HMDB0013623 |
| 13-carboxy-alpha-tocopherol                                           | C02477     | HMDB0012555 |
| 13-carboxy-gamma-tocopherol                                           | C02483     | HMDB0012557 |
| 13-hydroxy-alpha-Tocopherol                                           | #N/A       | HMDB0012559 |
| 13-hydroxy-alpha-tocotrienol                                          | #N/A       | HMDB0012560 |
| 15-hydroxy-(8z,11z,13e)-eicosatrienoate                               | C04742     | HMDB0005045 |
| 1-deoxy-1-(n6-lysino)-d-fructose                                      | #N/A       | HMDB0062186 |
| 1-methyladenosine                                                     | C02494     | HMDB0003331 |
| 1-methyl-histidine                                                    | C01152     | HMDB0000001 |
| 1-methylnicotinamide                                                  | C02918     | HMDB0000699 |
| 1-piperidine-6-carboxylate/1-piperidine-2-carboxylate                 | C00450     | HMDB0062589 |
| 1-pyrroline-2-carboxylate/1-pyrroline-5- carboxylate                  | C03564     | HMDB0006875 |
| 2,3-dihydroxybenzoic acid                                             | C00196     | HMDB0000397 |
| 2,3-diphosphoglyceric acid                                            | C00236     | HMDB0001294 |
| 2,3-epoxy-alpha-tocopheryl quinone/5,6-epoxy-alpha-tocopheryl quinone | C02477     | HMDB0034408 |
| 2-acetamido-5-oxopentanoate                                           | C01110     | HMDB0006488 |
| 2-aminoacrylic acid                                                   | C02218     | HMDB0003609 |
| 2-aminomuconate                                                       | C02220     | HMDB0001241 |
| 2-aminooctanoic acid                                                  | #N/A       | HMDB0000991 |
| 2-carboxy-2,3-dihydro-5,6- dihydroxyindole/1-dopaquinone              | C00822     | HMDB0039119 |
| 2-dehydro-d-gluconate                                                 | C06473     | HMDB0011732 |
| 2-deoxy-d-ribose                                                      | C01801     | HMDB0003224 |
| 2-deoxyglucose-6-phosphate                                            | C06369     |             |
| 2-hydroxy-2-methylbutanedioic acid                                    | #N/A       | HMDB0001844 |
| 2-hydroxyglutarate                                                    | C02630     | HMDB0059655 |
| 2-isopropylmalic acid                                                 | C02504     | HMDB0000402 |
| 2-keto-3-deoxy-d-glycero-d-galactonic acid 9-phosphate                | #N/A       | HMDB0001376 |
| 2-keto-3-deoxy-d-glycero-d-galactonic acid                            | #N/A       | HMDB0001353 |
| 2-ketohexanoic acid                                                   | #N/A       |             |
| 2-keto-isovalerate                                                    | C00141     | HMDB0000019 |
| 2-methylglutaconic acid                                               | C03761     | HMDB0002266 |
| 2-oxo-4-methylthiobutanoate                                           | C01180     | HMDB0001553 |
| 2-oxoadipate                                                          | C00322     | HMDB0000225 |
| 2-oxobutanoate                                                        | C00109     | HMDB0000005 |

|                                                                                                                     |        |             |
|---------------------------------------------------------------------------------------------------------------------|--------|-------------|
| 2-oxoglutarate                                                                                                      | C00940 | HMDB0001552 |
| 2-phenylethanaminium                                                                                                | C05332 | HMDB0012275 |
| 3(s)10(r)-oh-octadeca-6-trans-4,12-cis-trienoate                                                                    | #N/A   |             |
| 3(s)6(r)-dihydroxy-tetradec-8z- enoate/3(s)6(s)-dihydroxy-tetradec-8z-enoate                                        | #N/A   |             |
| 3,5-dihydroxy-3,4-dihydro-1,4- benzothiazine                                                                        | #N/A   | HMDB0062347 |
| 3alpha-7alpha-12alpha-25-Tetrahydroxy-12alpha-Trihydroxy-5beta-Cholestanoate 5beta-Cholestane-24-one/3alpha-7alpha- | #N/A   | HMDB0062207 |
| 3-carboxy-alpha-chromanol                                                                                           | #N/A   | HMDB0062349 |
| 3-d d-glucose                                                                                                       | #N/A   |             |
| 3-hydroxy-3-methylglutaryl-coa                                                                                      | C00356 | HMDB0001375 |
| 3-hydroxyanthranilate                                                                                               | C00632 | HMDB0001476 |
| 3-hydroxybutane-1,2,3-tricarboxylate/2-methylcitrate                                                                | C02225 | HMDB0006471 |
| 3-hydroxybutyryl-coa                                                                                                | C01144 | HMDB0001166 |
| 3-hydroxyhexadecanoylcarnitine                                                                                      | #N/A   | HMDB0013336 |
| 3-methylcrotonoylglycine                                                                                            | #N/A   |             |
| 3-methylphenylacetic acid                                                                                           | #N/A   | HMDB0002222 |
| 3-oxo-10(r)-hydroxy-octadeca-6e8e12z- trienoate/3-oxo-10(s)-hydroxy-octadeca-6e8e12z-trienoate                      | #N/A   |             |
| 3-oxo-6(r)-hydroxy-tetradec-8-cis- enoate/3-oxo-6(s)-hydroxy-tetradec-8z-enoate                                     | #N/A   |             |
| 3-oxo-8(r)-hydroxy-hexadeca-6e10z- dienoate/3-oxo-8(s)-hydroxy-hexadeca-6e10z-dienoate                              | #N/A   |             |
| 3-phosphoglycerate                                                                                                  | C00197 | HMDB0000807 |
| 3-phospho-serine                                                                                                    | C01005 | HMDB0001721 |
| 3-s-methylthiopropionate                                                                                            | C08276 | HMDB0031192 |
| 3-sulfinol-alanine                                                                                                  | C00606 | HMDB0000996 |
| 3-sulfonatolactate                                                                                                  | #N/A   | HMDB0060176 |
| 4-(2-amino-3-hydroxyphenyl)-4-oxobutanoic acid o-glucoside                                                          | #N/A   | HMDB0062374 |
| 4(r)-hydroxy-dodec-6z-enoate/4(s)-hydroxy-dodec-6z-enoate                                                           | #N/A   |             |
| 4-(trimethylammonio)butanoate/acetylcholine                                                                         | C01996 | HMDB0000895 |
| 4alpha-5-Epoxy-8alpha-8alpha-Hydroperoxytocopherone Hydroperoxytocopherone/7-8-Epoxy-                               | #N/A   |             |
| 4-aminobutyrate                                                                                                     | C00334 | HMDB0000112 |
| 4-hydroperoxy-2-nonenal                                                                                             | #N/A   | HMDB0060287 |
| 4-hydroxy-2-nonenal/3,4-epoxynonanal                                                                                | #N/A   |             |
| 4-imidazolone-5-propanoate                                                                                          | C03680 | HMDB0001014 |
| 4-nitrophenolate                                                                                                    | C00870 | HMDB0001232 |
| 4-nitrophenyl sulfate                                                                                               | #N/A   | HMDB0006492 |
| 4-oxo-2-nonenal                                                                                                     | #N/A   | HMDB0060285 |
| 4-oxoproline                                                                                                        | C01877 |             |
| 4-pyridoxic acid                                                                                                    | C00847 | HMDB0000017 |
| 4-trimethylammoniobutanal                                                                                           | C01149 | HMDB0001345 |
| 5,6-dihydrothymine                                                                                                  | C00906 | HMDB0000079 |

|                                                                                          |        |             |
|------------------------------------------------------------------------------------------|--------|-------------|
| 5-amino-1-(5-phospho-d-ribose)imidazole                                                  | C04751 | HMDB0062575 |
| 5-guanidino-2-oxopentanoic acid                                                          | #N/A   | HMDB0004225 |
| 5-hydroxyindoleacetate                                                                   | C05635 | HMDB0000763 |
| 5-hydroxyisourate                                                                        | C11821 | HMDB0030097 |
| 5-methoxyindoleacetate                                                                   | C05660 | HMDB0004096 |
| 5-methoxytryptophan                                                                      | C00643 | HMDB0002339 |
| 5-methyl-thf                                                                             | C00440 | HMDB0001354 |
| 5-phospho-beta-d-riboseamine                                                             | C03090 | HMDB0001128 |
| 5-phosphoribosyl-1-pyrophosphate                                                         | C00119 | HMDB0000280 |
| 5-thio-glucose, is                                                                       | #N/A   |             |
| 6(s)-hydroxy-tetradeca-2e4e8z-trienoate trienoate/6(r)-hydroxy-tetradeca-2e4e8z-         | #N/A   |             |
| 6-phospho-d-gluconate                                                                    | C00345 | HMDB0001316 |
| 6-phospho-d-glucono-1,5-lactone                                                          | C01236 | HMDB0001127 |
| 7,8-dihydrofolate                                                                        | C00415 | HMDB0001056 |
| 7-methylguanosine                                                                        | C20674 | HMDB0001107 |
| 8(r)-hydroxy-hexadeca-2e4e6e10z-2e4e6e10z-tetraenoate tetraenoate/8(s)-hydroxy-hexadeca- | #N/A   |             |
| 9(10)-epome/12(13)-epome                                                                 | #N/A   | HMDB0004701 |
| 9,10-hydroxyoctadec-12(z)-enoate/12,13-hydroxyoctadec-9(z)-enoate                        | #N/A   | HMDB0004705 |
| Acadesine                                                                                | C04663 |             |
| Acetoacetate                                                                             | C00164 | HMDB0000060 |
| Acetoacetyl-coa                                                                          | C00332 | HMDB0001484 |
| Acetyl adenylate                                                                         | C05993 | HMDB0006880 |
| Acetylcarnitine DL                                                                       | C02571 | HMDB0000201 |
| Acetyl-coa                                                                               | C00024 | HMDB0001206 |
| Acetyllysine                                                                             | C12989 | HMDB0000446 |
| Acetylphosphate                                                                          | C00227 | HMDB0001494 |
| Aconitate                                                                                | C00417 | HMDB0000072 |
| Adenine                                                                                  | C00147 |             |
| Adenosine                                                                                | C00212 | HMDB0000050 |
| Adenosine 5-phosphosulfate                                                               | C00224 | HMDB0001003 |
| Adipic acid                                                                              | C06104 | HMDB0000448 |
| ADP                                                                                      | C00008 | HMDB0001341 |
| ADP-d-glucose                                                                            | C00498 | HMDB0006557 |
| Adrenaline/l-normetanephrine                                                             | C00788 | HMDB0000819 |
| Agmatinium                                                                               | C00179 | HMDB0001432 |
| A-ketoglutarate                                                                          | C00026 | HMDB0059655 |
| AMP                                                                                      | C00020 | HMDB0003540 |
| Anthranilate                                                                             | C00108 | HMDB0001123 |
| Arachidonate/eicosatetranoic acid                                                        | C00219 | HMDB0001043 |
| Argpyrimidine                                                                            | #N/A   | HMDB0037180 |
| Ascorbic acid                                                                            | C00072 | HMDB0000044 |
| Asparagine                                                                               | C00152 | HMDB0000168 |
| Aspartate                                                                                | C00049 | HMDB0000191 |

|                                          |        |             |
|------------------------------------------|--------|-------------|
| ATP                                      | C00002 | HMDB0000538 |
| Atrolactic acid                          | #N/A   |             |
| Azelaic acid                             | C08261 | HMDB0000784 |
| Benzoate                                 | C00180 | HMDB0001870 |
| Beta-carboline                           | C20157 | HMDB0012897 |
| Beta-hydroxy-beta-methylbutyrate         | C20827 | HMDB0000754 |
| Betaine                                  | C00719 | HMDB0000043 |
| Betaine aldehyde                         | C00576 | HMDB0001252 |
| Biotin                                   | C00120 | HMDB0000030 |
| But-2-ene-1,2,3-tricarboxylate           | C04225 | HMDB0006357 |
| Butyryl-coa                              | C00136 | HMDB0001088 |
| C10h16o(3)                               | C09847 | HMDB0035092 |
| C14h24o3(4)                              | #N/A   | HMDB0032369 |
| C16h26o3(4)                              | C09694 | HMDB0060055 |
| C18h32o4(3)                              | C07338 | HMDB0062637 |
| C20h28o2(7)                              | C00777 | HMDB0038702 |
| C20h30o2(4)                              | C06428 | HMDB0036826 |
| C20h30o3(6)                              | C00909 | HMDB0035311 |
| C20h30o4(18)                             | C05957 | HMDB0041055 |
| C20h30o5(11)                             | C20214 | HMDB0038693 |
| C20h32o3(12)                             | C14749 | HMDB0038693 |
| C20h32o4(21)                             | C02165 | HMDB0062756 |
| C20h32o5(15)                             | C06314 | HMDB0062798 |
| C20h32o6(8)                              | C05956 | HMDB0062683 |
| C20h34o4(4)                              | C14774 | HMDB0035379 |
| C27h42o4(3)                              | C08902 | HMDB0030066 |
| C27h44o2(5)                              | C01561 | HMDB0035585 |
| C27h44o3(5)                              | C17336 | HMDB0060133 |
| C27h46o3(6)                              | C06341 | HMDB0062675 |
| C27h46o4(3)                              | C01301 | HMDB0062208 |
| C3h4o2(3)                                | C00511 | HMDB0031647 |
| C3h6o2(4)                                | C00163 | HMDB0031229 |
| C4h8o3(3)                                | C00989 | HMDB0031212 |
| C5h10o5(6)                               | C00121 | HMDB0000751 |
| C6h11no3(4)                              | C02946 | HMDB0094698 |
| C8h16no9p(4)                             | C00357 | HMDB0006480 |
| Caprate                                  | #N/A   | HMDB0000511 |
| Carbamoyl phosphate                      | C00169 | HMDB0001096 |
| Carnitine                                | C00487 | HMDB0000062 |
| Carnosine                                | C00386 | HMDB0000033 |
| CDP                                      | C00112 | HMDB0001546 |
| CDP-choline                              | C00307 | HMDB0001413 |
| CDP-ethanolamine                         | C00570 | HMDB0001564 |
| Cellobiose                               | C00185 | HMDB0000055 |
| Cervonic acid c22:6 n-3/docosahexaenoate | C06429 | HMDB0062579 |
| Cholesteryl sulfate                      | C18043 | HMDB0000653 |

|                                                        |        |             |
|--------------------------------------------------------|--------|-------------|
| Cholic acid                                            | C00695 | HMDB0000619 |
| Choline                                                | C00114 | HMDB0000097 |
| Choline phosphate                                      | C00588 | HMDB0001565 |
| Citraconic acid                                        | C02226 | HMDB0000634 |
| Citrate                                                | C00158 | HMDB0000094 |
| Citrate-isocitrate                                     | C00311 | HMDB0000094 |
| Citrulline                                             | C00327 | HMDB0000904 |
| Clupanodonic acid/docosa-4,7,10,13,16- pentaenoic acid | #N/A   | HMDB0006528 |
| CMP                                                    | C00055 | HMDB0000095 |
| CMP-2-aminoethylphosphonate                            | C05673 | HMDB0060067 |
| CMP-n-acetyl-beta-neuraminate                          | C00128 | HMDB0062695 |
| CMP-n-trimethyl-2- aminoethylphosphonate               | C05674 | HMDB0060072 |
| Coenzyme A                                             | C00010 | HMDB0001423 |
| Creatine                                               | C00300 | HMDB0000064 |
| Creatinine                                             | C00791 | HMDB0000562 |
| CTP                                                    | C00063 | HMDB0000082 |
| Cyclic ADP-ribose                                      | C13050 | HMDB0011671 |
| Cyclic bis(3->5) dimeric GMP                           | C16463 | HMDB0001314 |
| Cyclic-AMP                                             | C00575 | HMDB0000058 |
| Cystathionine                                          | C02291 | HMDB0000099 |
| Cysteine                                               | C00097 | HMDB0000574 |
| Cysteine sulfonic acid                                 | C00606 | HMDB0000731 |
| Cystine                                                | C00491 | HMDB0000192 |
| Cytidine                                               | C00475 | HMDB0000089 |
| Cytosine                                               | C00380 | HMDB0000630 |
| D-alanyl-d-alanine                                     | C00993 | HMDB0003459 |
| dAMP                                                   | C00360 | HMDB0000905 |
| dATP                                                   | C00131 | HMDB0001532 |
| dCDP                                                   | C00705 | HMDB0001245 |
| dCMP                                                   | C00239 | HMDB0001202 |
| dCTP                                                   | C00458 | HMDB0000998 |
| Deoxyadenosine                                         | C00559 | HMDB0000101 |
| Deoxycholic acid                                       | C04483 | HMDB0000626 |
| Deoxyguanosine                                         | C00330 | HMDB0000085 |
| Deoxyinosine                                           | C05512 | HMDB0000071 |
| Deoxyribose-phosphate                                  | C00673 | HMDB0001031 |
| Deoxyuridine                                           | C00526 | HMDB0000012 |
| Dephospho-coa                                          | C00882 | HMDB0001373 |
| D-erythronic acid                                      | #N/A   | HMDB0000613 |
| D-erythrose-4-phosphate                                | C00279 | HMDB0001321 |
| dGDP                                                   | C00361 | HMDB0000960 |
| D-glucarate                                            | C00818 | HMDB0000663 |
| D-gluconate                                            | C00257 | HMDB0000625 |
| D-glucosamine-1-phosphate                              | C06156 | HMDB0001109 |
| D-glucosamine-6-phosphate                              | C00352 | HMDB0001254 |

|                                      |        |             |
|--------------------------------------|--------|-------------|
| D-glucuronate 1-phosphate            | C05385 | HMDB0003976 |
| D-glyceraldehyde-3-phosphate         | C00118 | HMDB0001112 |
| dGMP                                 | C00362 | HMDB0001044 |
| dGTP                                 | C00286 | HMDB0001440 |
| Dihomo-gamma-linolenic acid (n-6)    | C03242 | HMDB0002925 |
| Dihydroorotate                       | C00337 | HMDB0003349 |
| Dihydroxy-acetone-phosphate          | C00111 | HMDB0001473 |
| Diiodothyronine                      | #N/A   | HMDB0000582 |
| Dimethylglycine                      | C01026 | HMDB0000092 |
| Diphosphate                          | C00013 | HMDB0000250 |
| Dl-pipecolic acid                    | C00408 | HMDB0000070 |
| Dodecanedioic acid                   | C02678 | HMDB0000623 |
| Dopaminium                           | C03758 | HMDB0000073 |
| Dopaminochrome                       | C03758 | HMDB0000073 |
| D-sedoheptulose-7-phosphate          | C00447 | HMDB0001068 |
| dTDP                                 | C00363 | HMDB0001274 |
| dTMP                                 | C00364 | HMDB0001227 |
| dTTP                                 | C00459 | HMDB0001342 |
| dUMP                                 | C00365 | HMDB0001409 |
| dUTP                                 | C00460 | HMDB0001191 |
| Elaidic carnitine/vaccenyl carnitine | #N/A   | HMDB0006464 |
| Erythro-5-hydroxy-l-lysiniium        | C16741 | HMDB0062570 |
| Estrone 3-sulfate                    | C02538 | HMDB0001425 |
| Ethamp[C]                            | #N/A   |             |
| Ethanolamine                         | C00189 | HMDB0000149 |
| FAD                                  | C00016 | HMDB0001248 |
| Flavone                              | #N/A   | HMDB0003075 |
| FMN                                  | C00061 | HMDB0001520 |
| Folate                               | C00504 | HMDB0000121 |
| Fructose-1,6-bisphosphate            | C05378 | HMDB0001058 |
| Fructose-6-phosphate                 | C00085 | HMDB0000124 |
| Fructoseglycine                      | #N/A   | HMDB0060278 |
| Fumarate                             | C00122 | HMDB0000134 |
| Galactosylglycerol                   | C05401 | HMDB0006790 |
| Gamma-l-glutamyl-l-cysteine          | C00669 | HMDB0001049 |
| GDP                                  | C00035 | HMDB0001201 |
| GDP-alpha-d-mannose                  | C00096 | HMDB0001163 |
| Geranyl-PP                           | C00341 | HMDB0001285 |
| Glucono-d-lactone                    | C00198 | HMDB0000150 |
| Glucosamine                          | C00329 | HMDB0001514 |
| Glucose, neg                         | C00031 | HMDB0000122 |
| Glucose-1-phosphate                  | C00103 | HMDB0001586 |
| Glucose-6-phosphate                  | C00668 | HMDB0001401 |
| Glutamate                            | C00025 | HMDB0000148 |
| Glutamine                            | C00064 | HMDB0000641 |
| Glutathione                          | C00051 | HMDB0000125 |



|                                                                                   |        |             |
|-----------------------------------------------------------------------------------|--------|-------------|
| Glutathione disulfide                                                             | C00127 | HMDB0003337 |
| Glycerate                                                                         | C00258 | HMDB0000139 |
| Glycerophosphocholine                                                             | C00670 | HMDB0000086 |
| Glycine                                                                           | C00037 | HMDB0000123 |
| Glycocholate                                                                      | C01921 | HMDB0000138 |
| Glycolate                                                                         | C00160 | HMDB0000115 |
| Glyoxylate                                                                        | C00048 | HMDB0000119 |
| GMP                                                                               | C00144 | HMDB0001397 |
| GTP                                                                               | C00044 | HMDB0001273 |
| Guanidoacetic acid                                                                | C00581 | HMDB0000128 |
| Guanine                                                                           | C00242 | HMDB0000132 |
| Guanosine                                                                         | C00387 | HMDB0000133 |
| Guanosine 5-diphosphate,3-diphosphate                                             | C01228 | HMDB0059638 |
| Heptadecanoyl carnitine                                                           | #N/A   | HMDB0006210 |
| Hexadecanedioic acid                                                              | #N/A   | HMDB0000220 |
| Hexose-phosphate                                                                  | 0      |             |
| Histamine                                                                         | C00388 | HMDB0000870 |
| Histidine                                                                         | C00135 | HMDB0000177 |
| Histidinol                                                                        | C00860 | HMDB0003431 |
| Homocysteic acid                                                                  | C16511 | HMDB0002205 |
| Homocysteine                                                                      | C05330 | HMDB0000742 |
| Homoserine                                                                        | C00263 | HMDB0000719 |
| Homovanillate/3-(4- hydroxyphenyl)lactate/3-methoxy-4-hydroxyphenylglycolaldehyde | #N/A   | HMDB0000118 |
| Hydroxyisocaproic acid                                                            | 0      | HMDB0000746 |
| Hydroxyphenylacetic acid                                                          | C05852 | HMDB0000440 |
| Hydroxyphenylpyruvate                                                             | C01179 | HMDB0011663 |
| Hydroxyproline                                                                    | C01157 | HMDB0000725 |
| Hypotaurine                                                                       | C00519 | HMDB0000965 |
| Hypoxanthine                                                                      | C00262 | HMDB0000157 |
| IDP                                                                               | C00104 | HMDB0003335 |
| Imidazole                                                                         | C01589 | HMDB0001525 |
| Imidazole-4-acetaldehyde                                                          | C05130 | HMDB0003905 |
| Imidazoleacetic acid                                                              | C02835 | HMDB0002024 |
| IMP                                                                               | C00130 | HMDB0011681 |
| Indole                                                                            | C00463 | HMDB0000738 |
| Indole-3-acetate/(5-hydroxyindol-3-yl)acetaldehyde                                | C00954 | HMDB0000197 |
| Indole-3-carboxylic acid                                                          | C19837 | HMDB0003320 |
| Indoleacrylic acid                                                                | C00331 | HMDB0000734 |
| Inosine                                                                           | C00294 | HMDB0000195 |
| Inositol trisphosphate                                                            | C01245 | HMDB0000189 |
| Isocitrate                                                                        | C00311 | HMDB0000193 |
| Isoputrescine/putrescine                                                          | #N/A   | HMDB0006009 |
| Kynurenic acid                                                                    | C01717 | HMDB0000715 |
| Kynurenine                                                                        | C00328 | HMDB0000684 |
| L-2-amino-3-oxobutanoic acid                                                      | C03508 | HMDB0006454 |

|                                                                            |        |             |
|----------------------------------------------------------------------------|--------|-------------|
| L-3-cyanoalanine/5,6-dihydrouracil                                         | C02512 | HMDB0060245 |
| Lactate                                                                    | C00186 | HMDB0000190 |
| Lactose                                                                    | C00243 | HMDB0000186 |
| L-arabinitol/xylitol/d-ribitol                                             | C00532 | HMDB0001851 |
| L-arginino-succinate                                                       | C03406 | HMDB0000052 |
| Laurate                                                                    | #N/A   |             |
| L-cysteate                                                                 | C00506 | HMDB0002757 |
| L-cysteine                                                                 | C00097 | HMDB0000574 |
| L-cysteinylglycine                                                         | C01419 | HMDB0000078 |
| L-erythrulose                                                              | C02045 | HMDB0006293 |
| Leucine-isoleucine                                                         | C00123 | HMDB0000172 |
| L-fucose/l-fuculose                                                        | C01019 | HMDB0000174 |
| L-glutamine                                                                | C00064 | HMDB0000641 |
| L-iditol/d-glucitol/galactitol                                             | C01507 | HMDB0011632 |
| Limonene/(+)-alpha-pinene                                                  | C06099 | HMDB0004321 |
| Linoelaidic acid (all trans<br>c18:2)/linoleate/octadecadienoate (n-c18:2) | C01595 | HMDB0000673 |
| Linoleyl carnitine/linoelaidyl carnitine                                   | #N/A   | HMDB0006469 |
| Lipoamide                                                                  | C00248 | HMDB0000962 |
| Lipoate                                                                    | C00725 | HMDB0000962 |
| L-palmitoylcarnitine                                                       | C02990 | HMDB0000222 |
| L-prolinylglycine/glycylproline                                            | #N/A   | HMDB0011178 |
| L-threonate                                                                | C01620 | HMDB0062620 |
| L-xylonate/l-lyxonate                                                      | C05411 | HMDB0060255 |
| Lysine                                                                     | C00047 | HMDB0000182 |
| Malate                                                                     | C00149 | HMDB0031518 |
| Maleic acid                                                                | C01384 | HMDB0000176 |
| Malonate/3-hydroxypyruvate                                                 | C00383 | HMDB0000691 |
| Malondialdehyde                                                            | C19440 | HMDB0006112 |
| Malonyl-coa                                                                | C00083 | HMDB0001175 |
| Margarate                                                                  | #N/A   | HMDB0002259 |
| Methionine                                                                 | C00073 | HMDB0000696 |
| Methionine sulfoxide                                                       | C02989 | HMDB0002005 |
| Methyl indole-3-acetate                                                    | C20635 | HMDB0029738 |
| Methylcysteine                                                             | C00155 | HMDB0002108 |
| Methylmalonic acid                                                         | C02170 | HMDB0000202 |
| Methylnicotinamide                                                         | C02918 | HMDB0003152 |
| Mevalonate                                                                 | C00418 | HMDB0000227 |
| Myo-inositol                                                               | C00137 | HMDB0000211 |
| Myristate                                                                  | C06424 | HMDB0000806 |
| N(6)-carboxyethyllysine                                                    | #N/A   |             |
| N(6)-carboxymethyllysine                                                   | #N/A   |             |
| N(8)-acetylspermidinium/n(1)-acetylspermidinium                            | #N/A   | HMDB0002189 |
| N2-formyl-n1-(5-phospho-d-ribosyl)glycinamide                              | #N/A   | HMDB0001308 |
| N6-acetyl-l-lysine                                                         | C02727 | HMDB0000206 |
| N6n6n6-trimethyl-l-lysine                                                  | #N/A   | HMDB0001325 |
| NAADP                                                                      | C13051 | HMDB0001179 |

|                                                          |        |             |
|----------------------------------------------------------|--------|-------------|
| N-acetylaspartic acid                                    | #N/A   | HMDB0000812 |
| N-acetylgalactosamine sulfate                            | #N/A   | HMDB0000841 |
| N-acetyl-glucosamine                                     | C00140 | HMDB0000215 |
| N-acetyl-glucosamine-1-phosphate                         | C04256 | HMDB0001367 |
| N-acetyl-glutamate                                       | C00624 | HMDB0001138 |
| N-acetyl-glutamine                                       | N/A    | HMDB0006029 |
| N-acetyl-l-alanine                                       | C00624 | HMDB0000766 |
| N-acetyl-l-aspartate/2-amino-3-oxoadipate                | C01042 | HMDB0000812 |
| N-acetyl-l-cysteine                                      | C06809 | HMDB0001890 |
| N-acetyl-l-ornithine                                     | C00437 | HMDB0003357 |
| N-acetylmethionine                                       | C02712 | HMDB0011745 |
| N-acetylneuraminic acid                                  | C00270 | HMDB0000230 |
| N-acetylputrescine                                       | C02714 | HMDB0002064 |
| N-acetyl-seryl-aspartate                                 | #N/A   | HMDB0062501 |
| NAD+                                                     | C00003 | HMDB0000902 |
| NADH                                                     | C00004 | HMDB0001487 |
| NADP+                                                    | C00006 | HMDB0000217 |
| NADPH                                                    | C00005 | HMDB0000221 |
| Naphthalene                                              | C00829 | HMDB0029751 |
| N-benzoylglycinate/adrenochrome                          | #N/A   | HMDB0000714 |
| N-carbamoyl-l-aspartate                                  | C00438 | HMDB0000828 |
| N-formimidoyl-l-glutamate/n-acetyl-asparagine            | #N/A   | HMDB0000854 |
| N-formylanthranilate/noradrenochrome                     | #N/A   | HMDB0004089 |
| Ng,Ng-dimethyl-l-arginine                                | C03626 | HMDB0001539 |
| Nicotinamide                                             | C00153 | HMDB0001406 |
| Nicotinamide ribotide                                    | C00455 | HMDB0000229 |
| Nicotinate                                               | C00253 | HMDB0001488 |
| N-methyl-4,6,7-trihydroxy-1,2,3,4-tetrahydroisoquinoline | #N/A   | HMDB0060065 |
| N-methylethanolaminium phosphate                         | C01210 | HMDB0060173 |
| Nonanoate                                                | C01601 | HMDB0000847 |
| N-phosphocreatinate                                      | C02305 | HMDB0062567 |
| O-acetyl-l-serine                                        | C00979 | HMDB0003011 |
| Octulose-1,8-bisphosphate (obp)                          | #N/A   |             |
| Octulose-monophosphate (o8p-o1p)                         | #N/A   |             |
| Omega hydroxy dodecanoate (n-c12:0)                      | #N/A   | HMDB0002059 |
| Omega hydroxy hexadecanoate (n-c16:0)                    | #N/A   | HMDB0006294 |
| Omega hydroxy tetradecanoate (n-c14:0)                   | #N/A   |             |
| O-methylhippurate                                        | #N/A   | HMDB0000859 |
| Ophthalmic acid                                          | #N/A   | HMDB0005765 |
| Ornithine                                                | C00077 | HMDB0000214 |
| Orotate                                                  | C00295 | HMDB0000226 |
| Orotidine-5-phosphate                                    | C01103 | HMDB0000218 |
| Oxalate                                                  | C00209 | HMDB0002329 |
| Oxalatosuccinate                                         | C05379 | HMDB0003974 |
| Oxaloacetate                                             | C00036 | HMDB0000223 |
| Palmitate                                                | C00249 | HMDB0000220 |

|                                                     |        |             |
|-----------------------------------------------------|--------|-------------|
| Palmitoleate                                        | C08362 | HMDB0003229 |
| P-aminobenzoate                                     | C00568 | HMDB0001392 |
| Pantothenate                                        | C00864 | HMDB0000210 |
| Pentadenoyl carnitine                               | #N/A   |             |
| Pentadecanoate                                      | C16537 | HMDB0000826 |
| Pentosidine                                         | C21014 | HMDB0003933 |
| Perillic acid                                       | C11924 | HMDB0004586 |
| Perillyl aldehyde                                   | C02576 | HMDB0003647 |
| Phenylacetaldehyde                                  | C00601 | HMDB0006236 |
| Phenylacetate/(4-hydroxyphenyl)acetaldehyde         | #N/A   | HMDB0003767 |
| Phenylalanine                                       | C00079 | HMDB0000159 |
| Phenyllactic acid                                   | C01479 | HMDB0000779 |
| Phenylpropionic acid                                | C05629 | HMDB0002359 |
| Phenylpyruvate                                      | C00166 | HMDB0000205 |
| Phosphodimethylethanolamine                         | C13482 | HMDB0060244 |
| Phosphoenolpyruvate                                 | C00074 | HMDB0000263 |
| Phosphorylcholine                                   | C00588 | HMDB0001565 |
| P-hydroxybenzoate                                   | C00156 | HMDB0000500 |
| Phytanate/arachidate                                | #N/A   | HMDB0000801 |
| Prephenate                                          | C00254 | HMDB0012283 |
| Pristanic acid/pristanate                           | #N/A   | HMDB0000795 |
| Proline                                             | C00148 | HMDB0000162 |
| Propionyl-coa                                       | C00100 | HMDB0001275 |
| Pseudoecgonine/ecgonine                             | #N/A   | HMDB0006548 |
| Purine                                              | C15587 | HMDB0001366 |
| Putrescine                                          | C00134 | HMDB0001414 |
| Pyridoxal                                           | C00018 | HMDB0001545 |
| Pyridoxamine                                        | C00534 | HMDB0001431 |
| Pyridoxine                                          | C00314 | HMDB0000239 |
| Pyroglutamic acid                                   | C01879 | HMDB0000267 |
| Pyrophosphate                                       | C00013 | HMDB0000250 |
| Pyrrolines                                          | #N/A   | HMDB0012497 |
| Pyruvate                                            | C00022 | HMDB0000243 |
| Quinolate                                           | C03722 | HMDB0000232 |
| Riboflavin                                          | C00255 | HMDB0000244 |
| Ribose-phosphate                                    | C00117 | HMDB0001548 |
| S-[2-carboxy-1-(1 h-imidazol-4-yl)ethyl]-l-cysteine | #N/A   |             |
| S-adenosyl-l-homocysteine                           | #N/A   | HMDB0000939 |
| S-adenosyl-l-methioninamine                         | C01137 | HMDB0000988 |
| S-adenosyl-l-methionine                             | C00019 | HMDB0001185 |
| Salsolinol 1-carboxylate                            | #N/A   | HMDB0013068 |
| Sarcosine                                           | C00213 | HMDB0000271 |
| Sebacic acid                                        | #N/A   | HMDB0000792 |
| <u>Sedoheptitol</u>                                 | #N/A   |             |
| Sedoheptulose 1,7-bisphosphate (sbp)                | #N/A   | HMDB0060274 |
| Serine                                              | C00065 | HMDB0000187 |
| Serotonin                                           | C00780 | HMDB0000259 |
| Shikimate                                           | C00493 | HMDB0003070 |
| Shikimate-3-phosphate                               | C03175 |             |

|                                                     |        |             |
|-----------------------------------------------------|--------|-------------|
| S-lactoylglutathionate                              | #N/A   | HMDB0001066 |
| S-methyl-5-thioadenosine                            | C00170 | HMDB0001173 |
| Sn-glycerol-3-phosphate                             | C00093 | HMDB0000126 |
| Sorbitol                                            | #N/A   | HMDB0000247 |
| Spermidine                                          | C00315 | HMDB0001257 |
| Spermidine dialdehyde-1                             | #N/A   | HMDB0013076 |
| Spermidine dialdehyde-2                             | #N/A   | HMDB0013076 |
| Spermine                                            | C00750 | HMDB0001256 |
| Sphingosine/(2s)-1-hydroxy-3-oxooctadecan-2-aminium | #N/A   | HMDB0000252 |
| Sphingosine-5-P                                     | #N/A   | HMDB0000277 |
| S-ribosyl-l-homocysteine                            | #N/A   | HMDB0002238 |
| Stearate                                            | C01530 | HMDB0000827 |
| Stearyl carnitine                                   | #N/A   | HMDB0000848 |
| Suberic acid                                        | C08278 | HMDB0000893 |
| Succinate                                           | C00042 | HMDB0000254 |
| Succinyl carnitine                                  | #N/A   | HMDB0061717 |
| Succinyl-coa                                        | C00091 | HMDB0001022 |
| Succinyl-coa-methylmalonyl-coa                      | #N/A   |             |
| Sulfate derivative of norepinephrine                | #N/A   |             |
| Sulfoglycolithocholate                              | #N/A   | HMDB0062801 |
| Taurine                                             | C00245 | HMDB0000251 |
| Taurocholic acid                                    | #N/A   | HMDB0000036 |
| Taurodeoxycholic acid                               | C05463 | HMDB0000896 |
| Taurolithocholate                                   | #N/A   | HMDB0000896 |
| Tetradecenoate (N-C14:1)                            | #N/A   | HMDB0000499 |
| Thiamine                                            | C00378 | HMDB0000235 |
| Thiamine pyrophosphate                              | C00068 | HMDB0001372 |
| Thiamine-phosphate                                  | C01081 | HMDB0002666 |
| Thiosulfate                                         | #N/A   | HMDB0000257 |
| Threonine                                           | C00188 | HMDB0000167 |
| Thymidine                                           | C00214 | HMDB0000273 |
| Thymine                                             | C00178 | HMDB0000262 |
| Trans, trans-farnesyl diphosphate                   | C00448 | HMDB0000961 |
| Trans-4,5-epoxy-2(e)-decenal                        | #N/A   | HMDB0013105 |
| Trans-hexadec-2-enoyl carnitine                     | #N/A   | HMDB0006317 |
| Trans-vaccenate/elaidate/oleate                     | #N/A   | HMDB0003231 |
| Trehalose-6-phosphate                               | C00689 | HMDB0001124 |
| Trehalose-sucrose                                   | C00089 |             |
| Tryptophan                                          | C00525 | HMDB0030396 |
| Tyramine o-sulfate                                  | #N/A   | HMDB0006409 |
| Tyraminium                                          | C00483 | HMDB0062629 |
| Tyrosine                                            | C00082 | HMDB0000158 |
| UDP                                                 | C00015 | HMDB0000295 |
| UDP-alpha-d-xylose                                  | C00190 | HMDB0001018 |
| UDP-d-glucose                                       | C00029 | HMDB0000286 |
| UDP-d-glucuronate                                   | C00167 | HMDB0000935 |
| UDP-N-acetyl-glucosamine                            | C00043 | HMDB0000290 |
| UMP                                                 | C00105 | HMDB0060282 |
| Uracil                                              | C00106 | HMDB0000300 |

|                        |        |             |
|------------------------|--------|-------------|
| Urea                   | C00086 | HMDB0000294 |
| Uric acid              | C00366 | HMDB0000289 |
| Uridine                | C00299 | HMDB0000296 |
| Urocanate              | C00785 | HMDB0000301 |
| UTP                    | C00075 | HMDB0000285 |
| Valine                 | C00183 | HMDB0000883 |
| Xanthine               | C00385 | HMDB0000292 |
| Xanthosine             | C01762 | HMDB0000299 |
| Xanthosine-5-phosphate | C00655 | HMDB0001554 |
| Xanthurenic acid       | C02470 | HMDB0000881 |

---

## SUPPLEMENTARY FIGURES

**Figure S1**

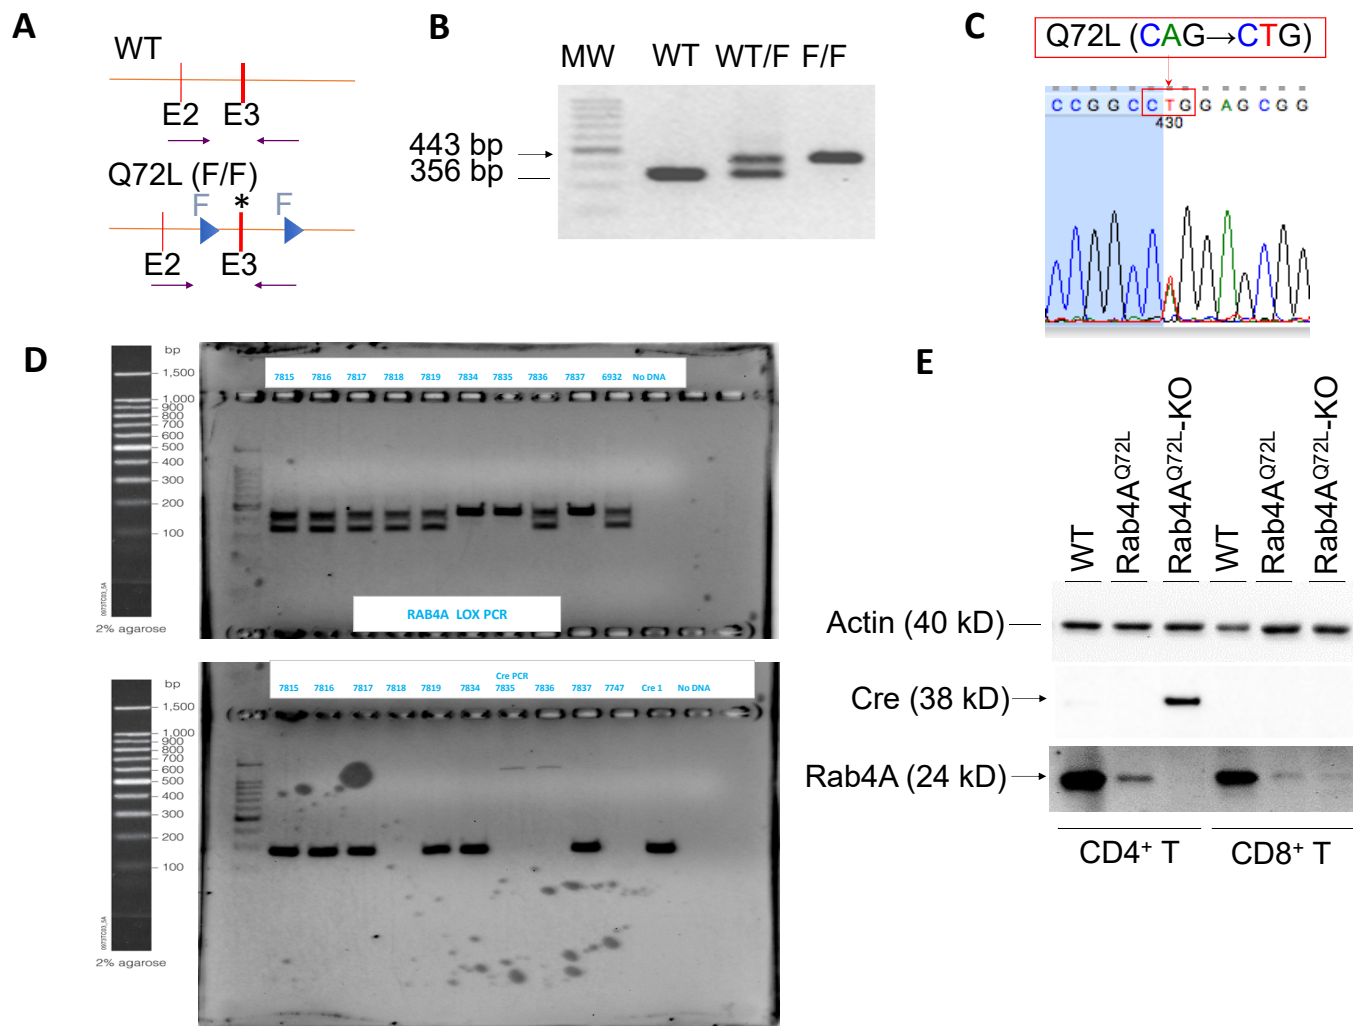



**Figure S1. Generation of mice with constitutively active Rab4A<sup>Q72L</sup> alleles.** We replaced exons 3 of the Rab4A genomic locus in 129SvJ-derived TC1 ES cells using a targeting vector with 5 kb upstream and 3 kb downstream genomic fragments harboring exon 2 and exons 4 and 5 respectively. Intron 3 contained a neomycin resistance cassette flanked by Frt recognition motifs. Intron 2 and intron 3 downstream of the neo cassette harbored LoxP sites to allow the removal of exon 3 by crossing with transgenic mice expressing Cre recombinase (panel A). The 129SvJ-derived TC1 ES cells heterozygous for the disrupted allele were microinjected into C57BL/6 blastocysts to generate chimeras. B) Chimeric males were mated with C57BL/6 females, and tail DNA of the offspring was tested for transmission of the targeted allele by PCR and sequencing of genomic DNA (panel C). Heterozygotes were back-crossed onto the C57BL/6 line for ten generations. Heterozygotes were bred and wildtype (WT), heterozygote, and homozygote mice with floxed Rab4A<sup>Q72L</sup> alleles were tracked by PCR genotyping (panel D). Homozygote Rab4A<sup>Q72L</sup> were mated with heterozygote CD4<sup>Cre</sup> transgenic mice to generate offspring lacking Rab4A expression in T cells (panel E). Expression of Rab4A was absent in CD4<sup>+</sup> and CD8<sup>+</sup> T cells of Rab4A<sup>Q72L</sup>-KO mice. Cre was expressed in CD4<sup>+</sup> T cells of Rab4A<sup>Q72L</sup>-KO mice. Cre was not expressed in peripheral CD8<sup>+</sup> T cells as deletion of Rab4A had occurred at the developmental stage of double-positive T cells in the thymus, as originally described in this targeted deletion model <sup>1</sup>.

# Figure S2

**A**

**Males**

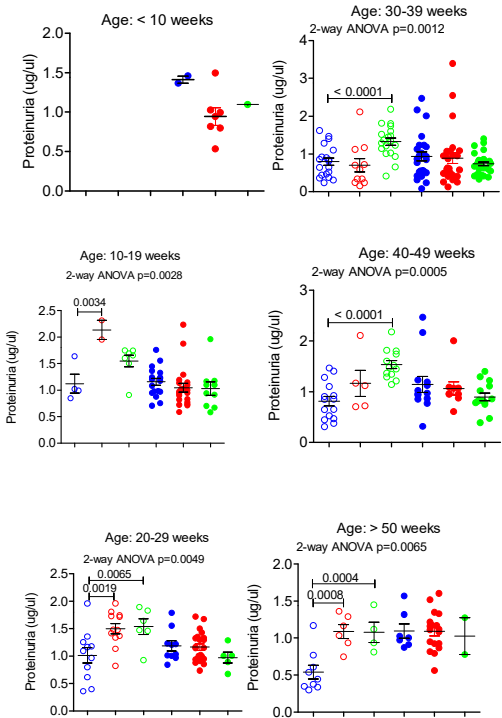

**B**

**Females**

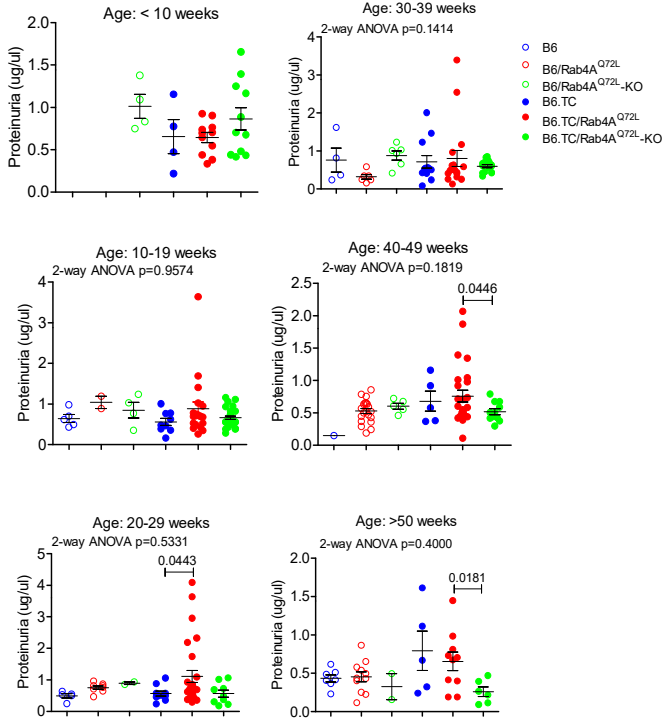

- B6
- B6/Rab4A<sup>Q72L</sup>
- B6/Rab4A<sup>Q72L</sup>-KO
- B6.TC
- B6.TC/Rab4A<sup>Q72L</sup>
- B6.TC/Rab4A<sup>Q72L</sup>-KO

**Figure S2. Effect of Rab4A on age-dependent changes in proteinuria in male and female B6 and B6.TC mice.** **A**, Proteinuria was increased in young adult male ( $1.12 \pm 0.18 \mu\text{g}/\mu\text{l}$ ) over female B6 mice at 10-19 weeks of age ( $0.65 \pm 0.96 \mu\text{g}/\mu\text{l}$ ;  $p=0.0395$ ). Proteinuria declined in males to  $0.541 \text{ ug/ul}$  by 50 weeks of age ( $p=0.0395$ ). **B**, Proteinuria was reduced with remarkable consistency in B6.TC/Rab4a<sup>Q72L</sup>-KO females relative to B6.TC/Rab4a<sup>Q72L</sup> females at ages of 20-29, 30-39, 40-49, and >50 weeks. Overall two-way ANOVA p values are shown in the header of each figure panel, while Tukey's post-hoc test p values < 0.05 over brackets reflect comparison between experimental groups.

Figure S3

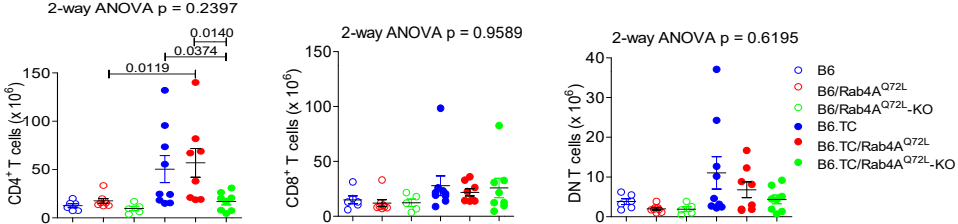

**Figure S3. Rab4A expands CD4<sup>+</sup> T cells at the expense of CD8<sup>+</sup> T cells both in B6 and B6.TC mice.** Expansion of CD4<sup>+</sup> T cells by Rab4A in 20-week-old B6/Rab4A<sup>Q72L</sup> and B6.TC/Rab4A<sup>Q72L</sup> female mice relative to B6/Rab4A<sup>Q72L</sup>-KO and B6.TC/Rab4A<sup>Q72L</sup>-KO controls, respectively. Upper panel, representative flow cytometry dot plots; lower panel, cumulative analysis of absolute numbers of CD4<sup>+</sup> and CD8<sup>+</sup> and DN T cells. Overall two-way ANOVA p values are shown in the header of each figure panel, while Tukey's post-hoc test p values < 0.05 over brackets reflect comparison between experimental groups.

# Figure S4

**A**

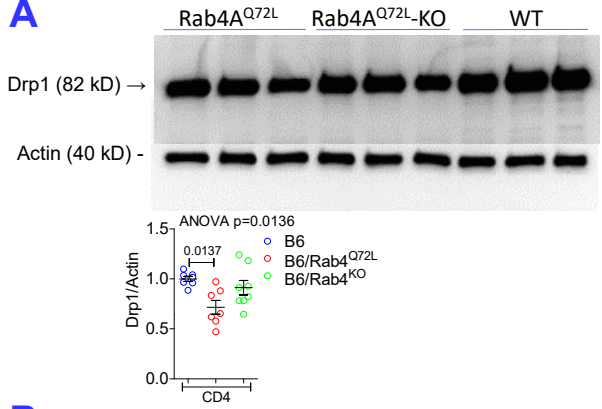

**B**

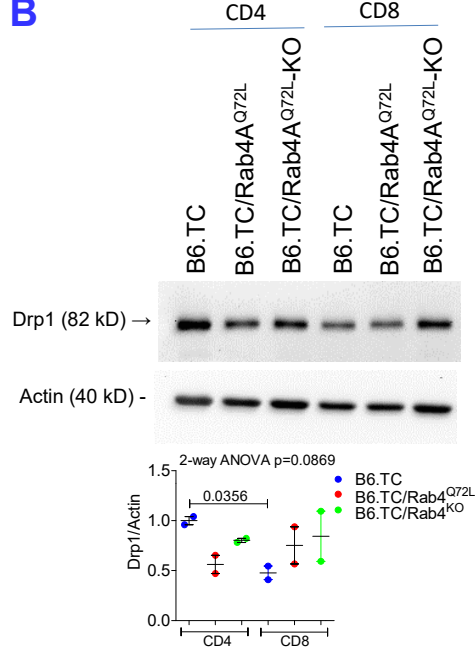

**C**

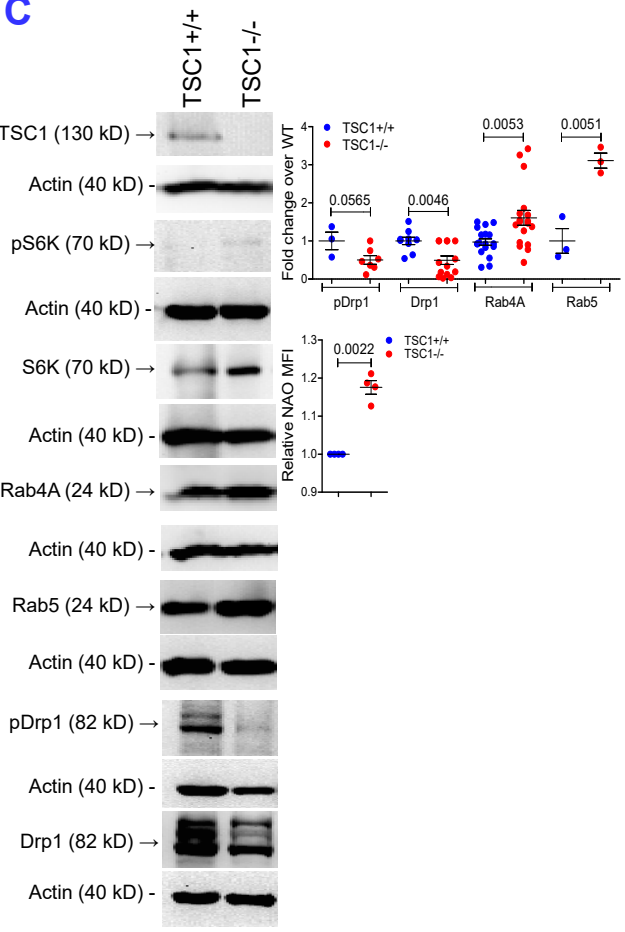

**D**

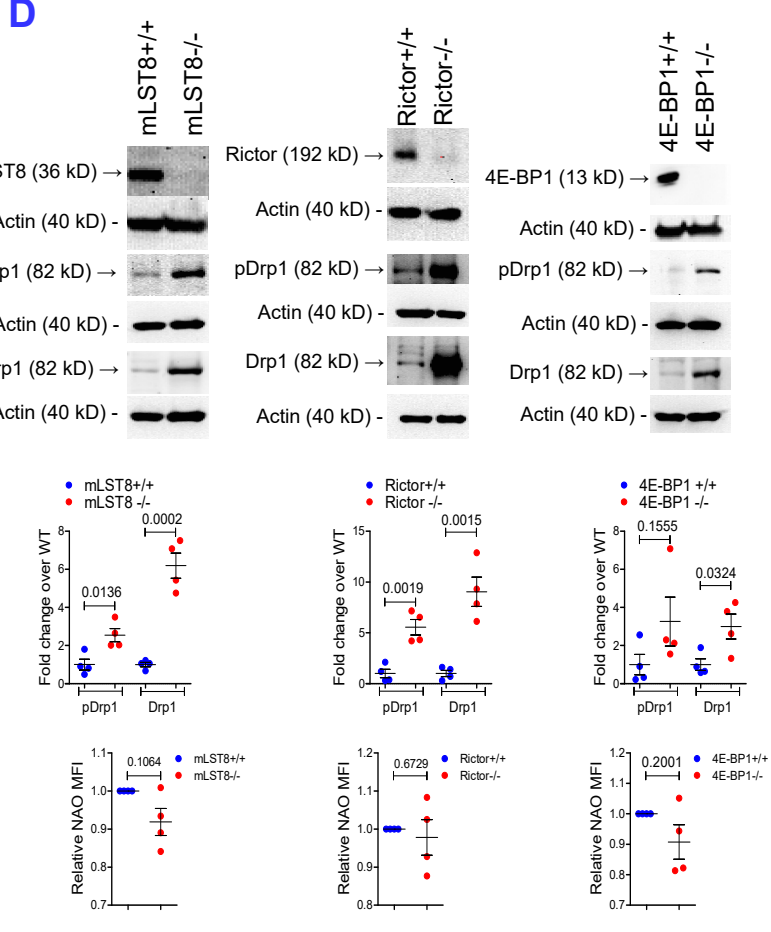

**Figure S4. Effect of Rab4 and mTOR activation on Drp1 expression and mitochondrial accumulation in mouse CD4<sup>+</sup> and CD8<sup>+</sup> T cells and embryonic fibroblasts (MEFs).** **A**, Western blot analysis of Drp1 expression in CD4<sup>+</sup> T cells of B6/WT, B6/Rab4A<sup>Q72L</sup>, and B6/Rab4A<sup>Q72L</sup>-KO mice. Representative western blots (top panel) and dot plot charts reflect mean  $\pm$  SE of independent experiments (bottom panel); brackets reflect  $p < 0.05$  indicating comparison to wild-type mice using two-tailed t-tests. Overall one-way ANOVA  $p$  values are shown in the header of each figure panel, while Sidak's post-hoc test  $p$  values  $< 0.05$  over brackets reflect comparison between experimental groups. **B**, Western blot analysis of Drp1 expression in CD4<sup>+</sup> and CD8<sup>+</sup> T cells of B6.TC, B6.TC/Rab4A<sup>Q72L</sup>, and B6.TC/Rab4A<sup>Q72L</sup>-KO mice. Overall two-way ANOVA  $p$  values are shown in the header of each figure panel, while Tukey's post-hoc test  $p$  values  $< 0.05$  over brackets reflect comparison between experimental groups. **C**, Western blot analysis of Rab4A, Drp1, and pDrp1 phosphorylated at serine 616 in TSC1<sup>-/-</sup> MEFs. Representative western blots (left panel) and bar charts reflect mean  $\pm$  SE of 3 or more experiments (right panel); \*,  $p < 0.05$  indicates comparison to wild-type MEFs using two-tailed t-tests. **D**, Western blot analysis of Rab4A, Drp1, and pDrp1 phosphorylated at serine 616 in MEFs lacking mLST8 (mLST8<sup>-/-</sup>), Rictor (Rictor<sup>-/-</sup>), or 4E-BP1 (4E-BP1<sup>-/-</sup>). Representative western blots (left panel) and bar charts reflect mean  $\pm$  SE of 3 or more experiments (right panel); \*,  $p < 0.05$  indicates comparison to wild-type MEFs using two-tailed t-tests.

Figure S5

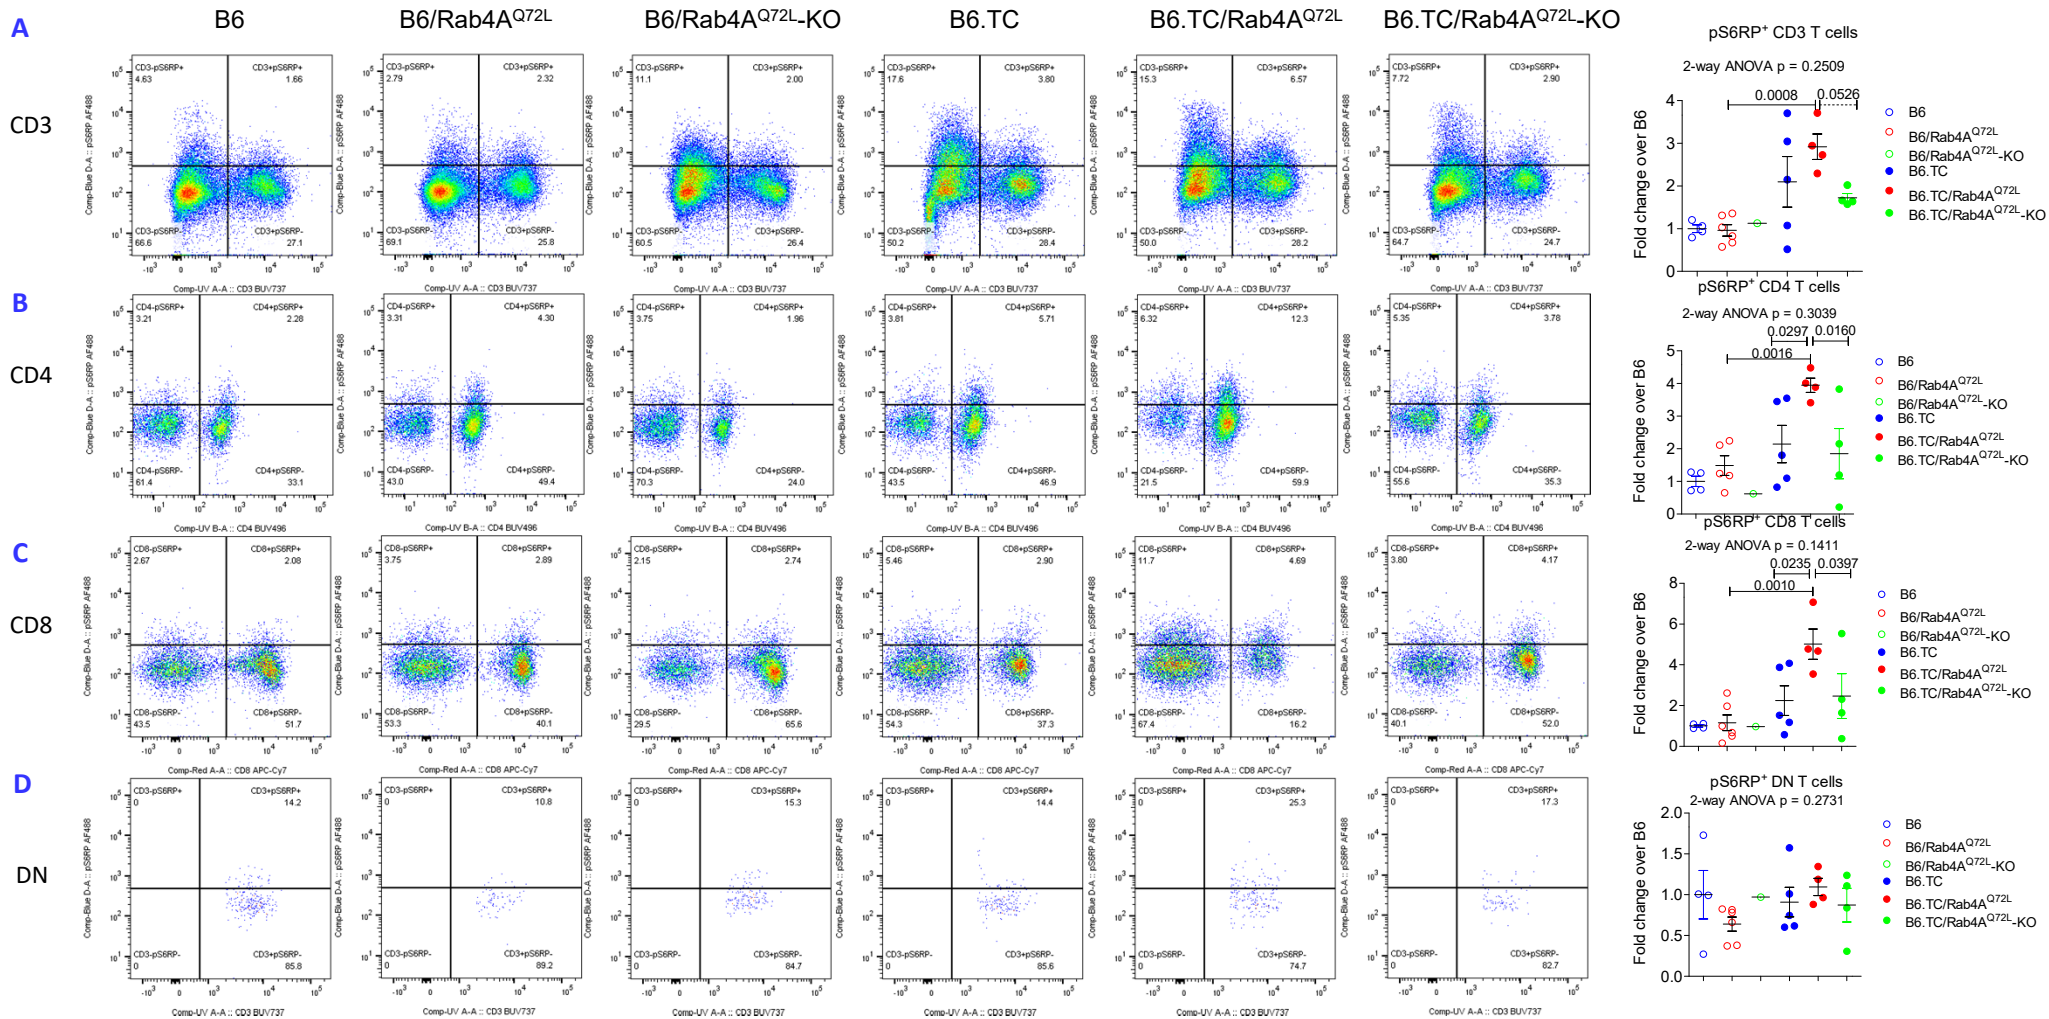



**Figure S5. Activation of mTORC1 in CD3, CD4, CD8, and DN T cells is Rab4A-dependent in SLE.** mTORC1 is activated in T cells of 20-week-old lupus-prone B6.TC/Rab4A<sup>Q72L</sup> mice relative to B6/Rab4A<sup>Q72L</sup> controls, which is reversed by the deletion of Rab4A in T cells of B6.TC/Rab4A<sup>Q72L</sup>-KO mice. Consistent trends were observed in CD3 (**A**), CD4 (**B**), CD8 (**C**), and DN T cells (**D**), as shown by representative flow cytometry dot plots (left panels) and cumulative analysis (right panels). Overall two-way ANOVA p values are shown in the header of each figure panel, while Sidak's post-hoc test p values < 0.05 over brackets reflect comparison between experimental groups. Dash line reflects p value <0.1

**Figure S6**

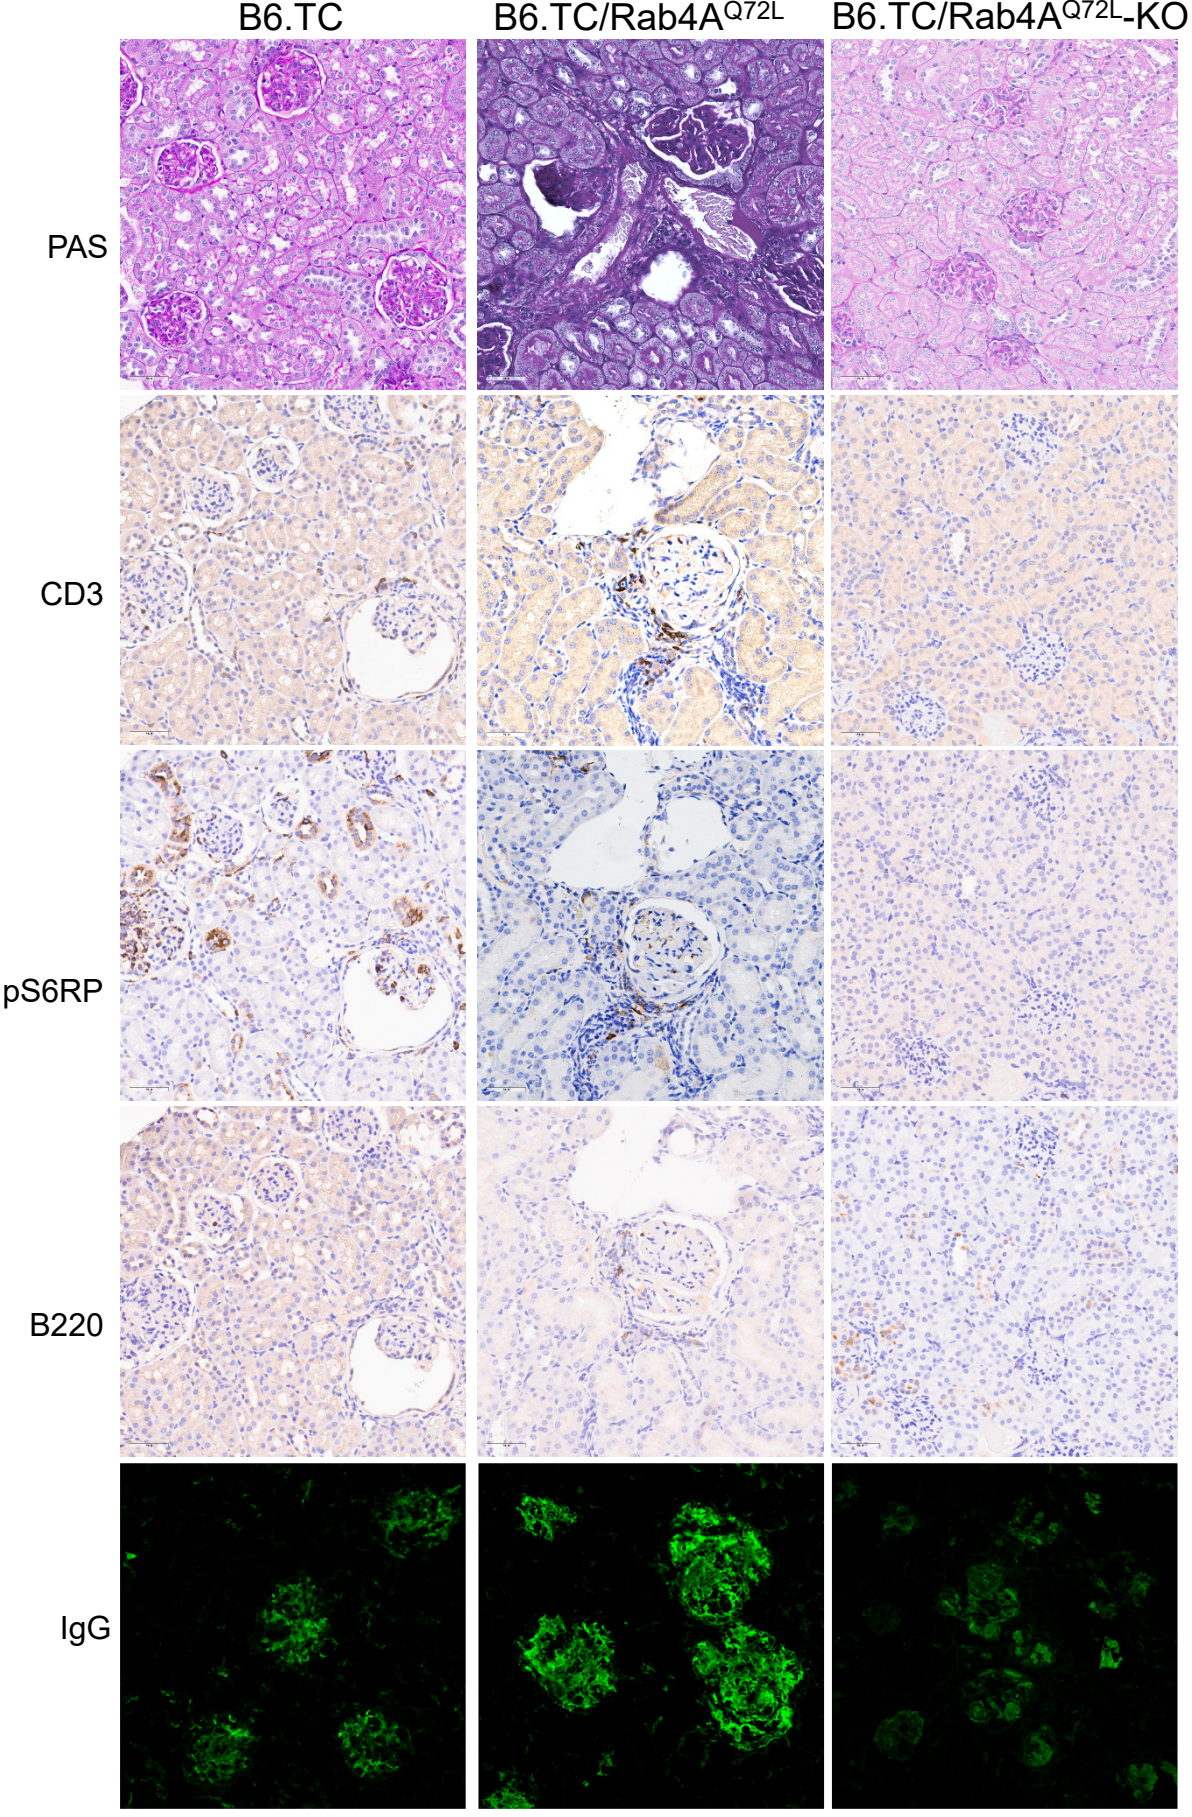

**Figure S6.** Detection CD3<sup>+</sup> T cells and B220<sup>+</sup> B cells, expression of pS6RP, and glomerular deposition of IgG and IgM in kidneys of 40-week-old female B6.TC, B6.TC/Rab4A<sup>Q72L</sup> and B6.TC/Rab4A<sup>Q72L</sup>-KO mice. Renal infiltration by CD3<sup>+</sup> T cells and B220<sup>+</sup> B cells and pS6RP were assessed by immunohistochemistry. Glomerular deposition of IgG and IgM was assessed by immunofluorescence microscopy. Scale bars are embedded into each microscopic image.

**Figure S7**

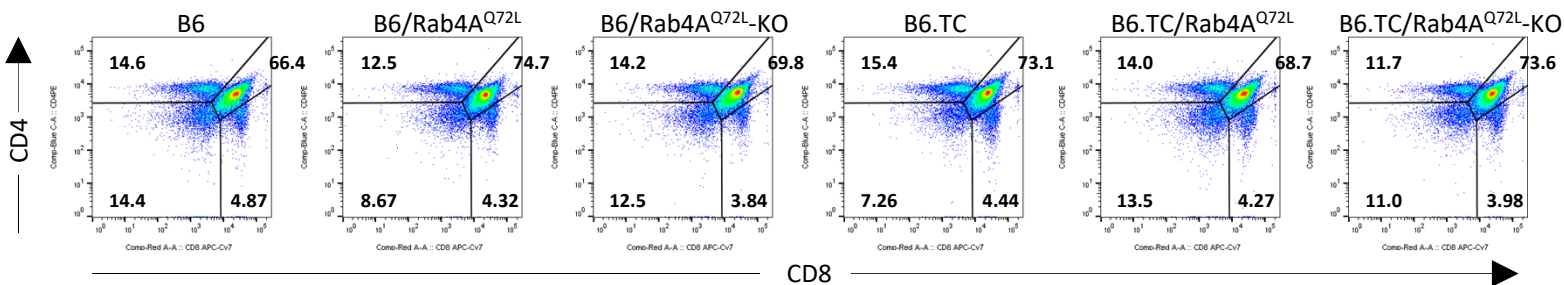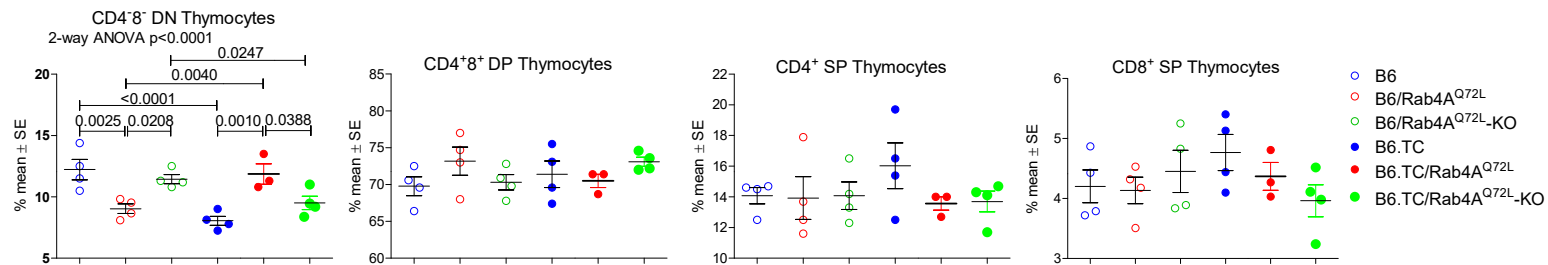

**Figure S7. Effect of Rab4A on T-cell development in the thymus.** Abundance of CD4<sup>-</sup>CD8<sup>-</sup> double-negative (DN) T cells, CD4<sup>+</sup>CD8<sup>+</sup> double-positive (DP) T cells and CD4<sup>+</sup> or CD8<sup>+</sup> single-positive (SP) T cells were assessed in the thymus of 23 age-matched female mice carrying WT or constitutively active Rab4<sup>Q72L</sup> alleles, or lacking Rab4A in T cells in the B6 control and B6.TC lupus-prone backgrounds. These mice were of 25 ± 1.7 weeks of age when B6.TC/Rab4A<sup>Q72L</sup> females already show increased inflammation, elevated autoantibody production and proteinuria (**Figure 1**). Upper panel, representative flow cytometry dot plots. Lower panel, cumulative analysis show the mean ± SE of DN, DP, and SP T cells. Overall two-way ANOVA p values are shown in the header of each figure panel, while Sidak's post-hoc test p values < 0.05 over brackets reflect comparison between experimental groups.



**Figure S8**

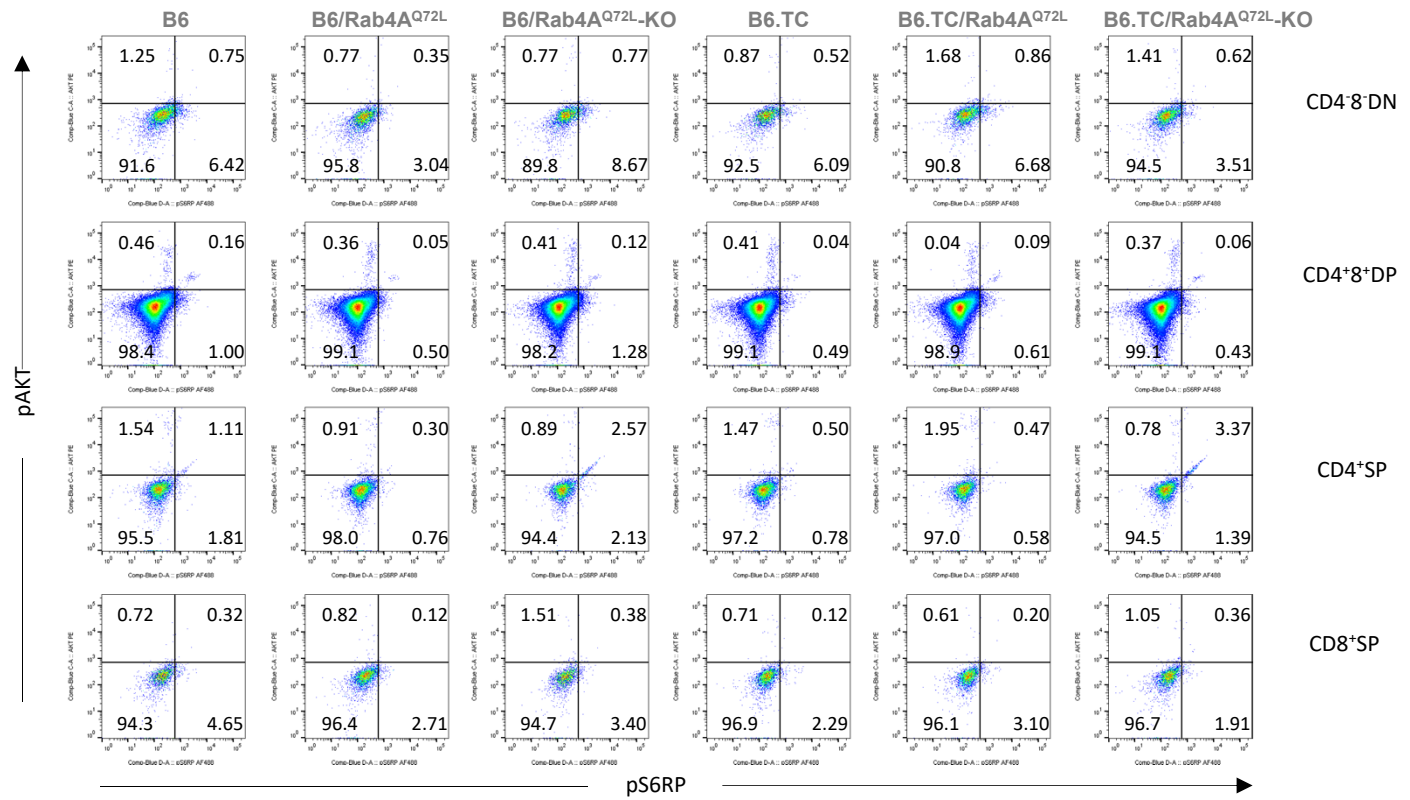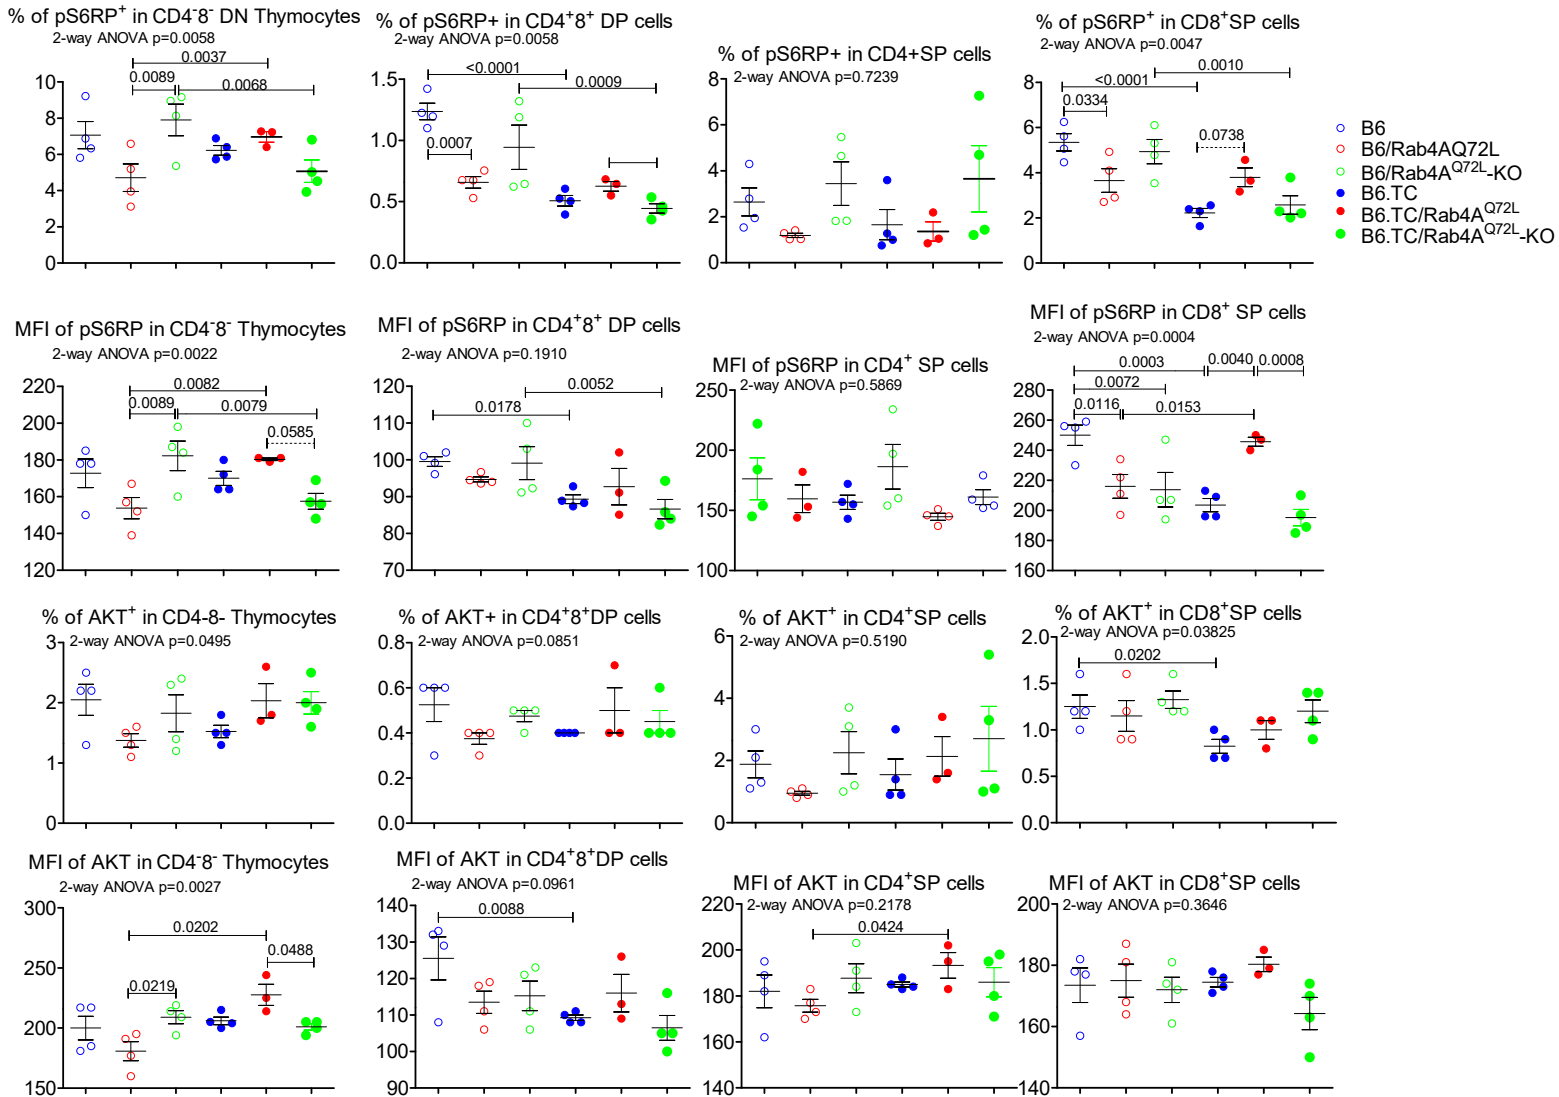

**Figure S8. Effect of Rab4A on activation of mTORC1 and mTORC2 in T cells of the thymus.** Activation of mTORC1 and mTORC2 was assessed within of CD4<sup>-</sup>CD8<sup>-</sup> double-negative (DN) T cells, CD4<sup>+</sup>CD8<sup>+</sup> double-positive (DP) T cells and CD4<sup>+</sup> or CD8<sup>+</sup> single-positive (SP) T cells of the thymus from 23 age-matched female mice carrying WT or constitutively active Rab4<sup>Q72L</sup> alleles, or lacking Rab4A in T cells in the B6 control and B6.TC lupus-prone backgrounds, as described in [Figure S5](#). Upper panel, representative flow cytometry dot plots. Lower panel, cumulative analysis show the mean ± SE of DN, DP, and SP T cells. Overall two-way ANOVA p values are shown in the header of each figure panel, while Sidak's post-hoc test p values < 0.05 over brackets reflect comparison between experimental groups.

**Figure S9**

**A**

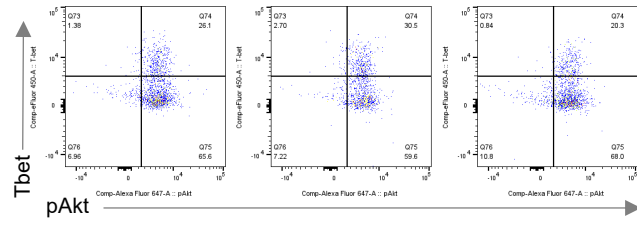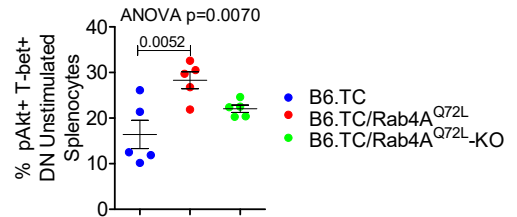

**B**

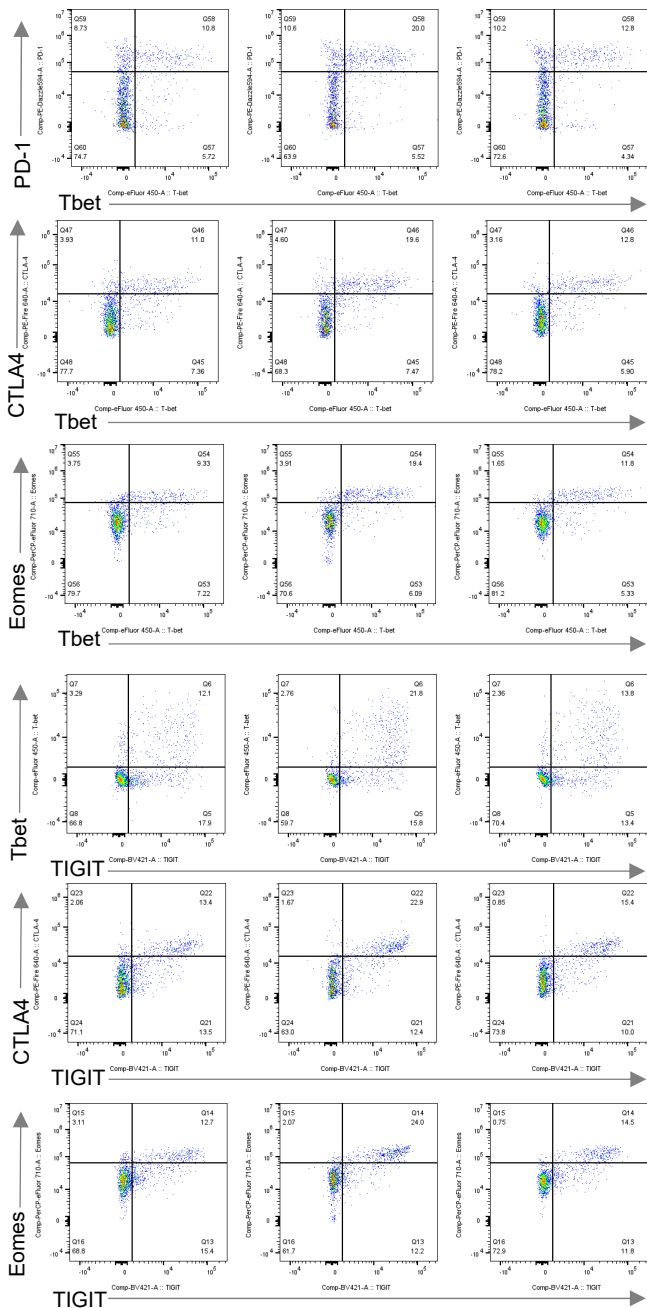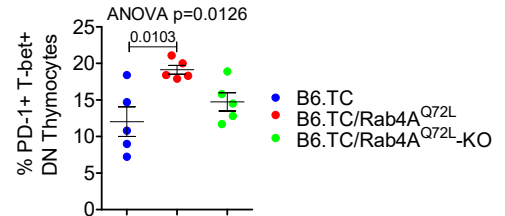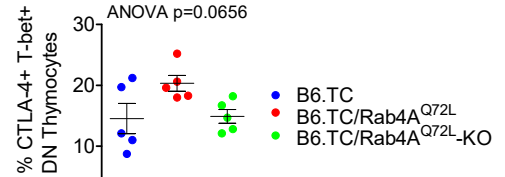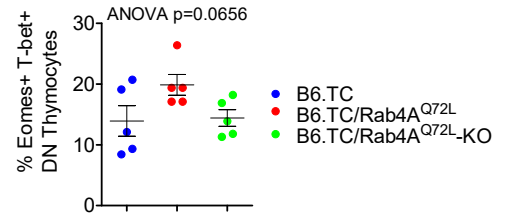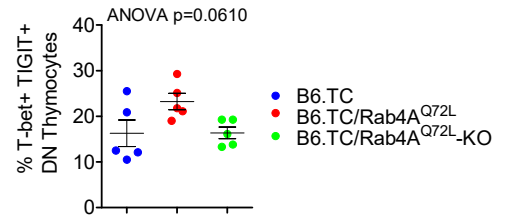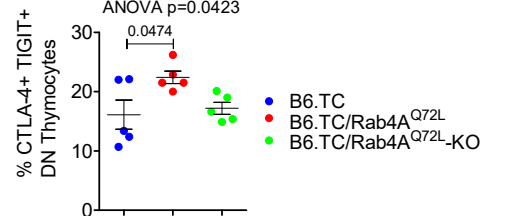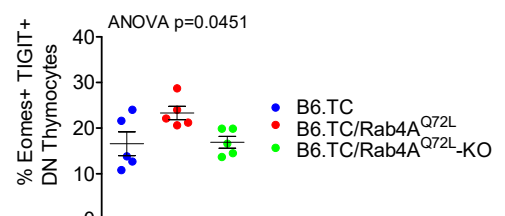



**Figure S9. Effect of Rab4A on markers of exhaustion in T cells of B6.TC,**

**B6.TC/Rab4A<sup>Q72L</sup>, and B6.TC/Rab4A<sup>Q72L</sup> -KO mice.** Markers of exhaustion, T-bet, Eomes, TIGIT, PD-1, PL-L2, and CTLA-4<sup>2</sup> were examine in CD4<sup>+</sup>, CD8<sup>+</sup>, and DN T cells from the spleen and DN, DP, CD4<sup>+</sup>, and CD8<sup>+</sup> SP T cells from the thymus of B6.TC, B6.TC/Rab4A<sup>Q72L</sup>, and B6.TC/Rab4A<sup>Q72L</sup> -KO mice, using five age-matched females per genotype. These mice were of 38 ± 0.6 weeks of age when B6.TC/Rab4A<sup>Q72L</sup> females already show increased inflammation, elevated autoantibody production and proteinuria. **A**, Expansion of T-bet<sup>+</sup>/pAkt<sup>+</sup> DN T cells in the spleen of B6.TC/Rab4A<sup>Q72L</sup> mice. Left panel, representative flow cytometry dot plots. Right panel, cumulative analysis shows the mean ± SE of DN T cells; p values represent comparison with two-tailed unpaired t-test. **B**, Expansion of PD-1<sup>+</sup>T-bet<sup>+</sup>, CTLA4<sup>+</sup>T-bet<sup>+</sup>, Eomes<sup>+</sup>T-bet<sup>+</sup>, TIGIT<sup>+</sup>T-bet<sup>+</sup>, TIGIT<sup>+</sup>CTLA4<sup>+</sup>, and TIGIT<sup>+</sup>Eomes<sup>+</sup> DN T cells in the thymus of B6.TC/Rab4A<sup>Q72L</sup> mice over those in B6.TC/Rab4A<sup>Q72L</sup>-KO mice. Left panel, representative flow cytometry dot plots. Right panel, cumulative analyses show the mean ± SE of DN T cells. Overall one-way ANOVA p values are shown in the header of each figure panel, while Tukey's post-hoc test p values < 0.05 over brackets reflect comparison between experimental groups.

Figure S10

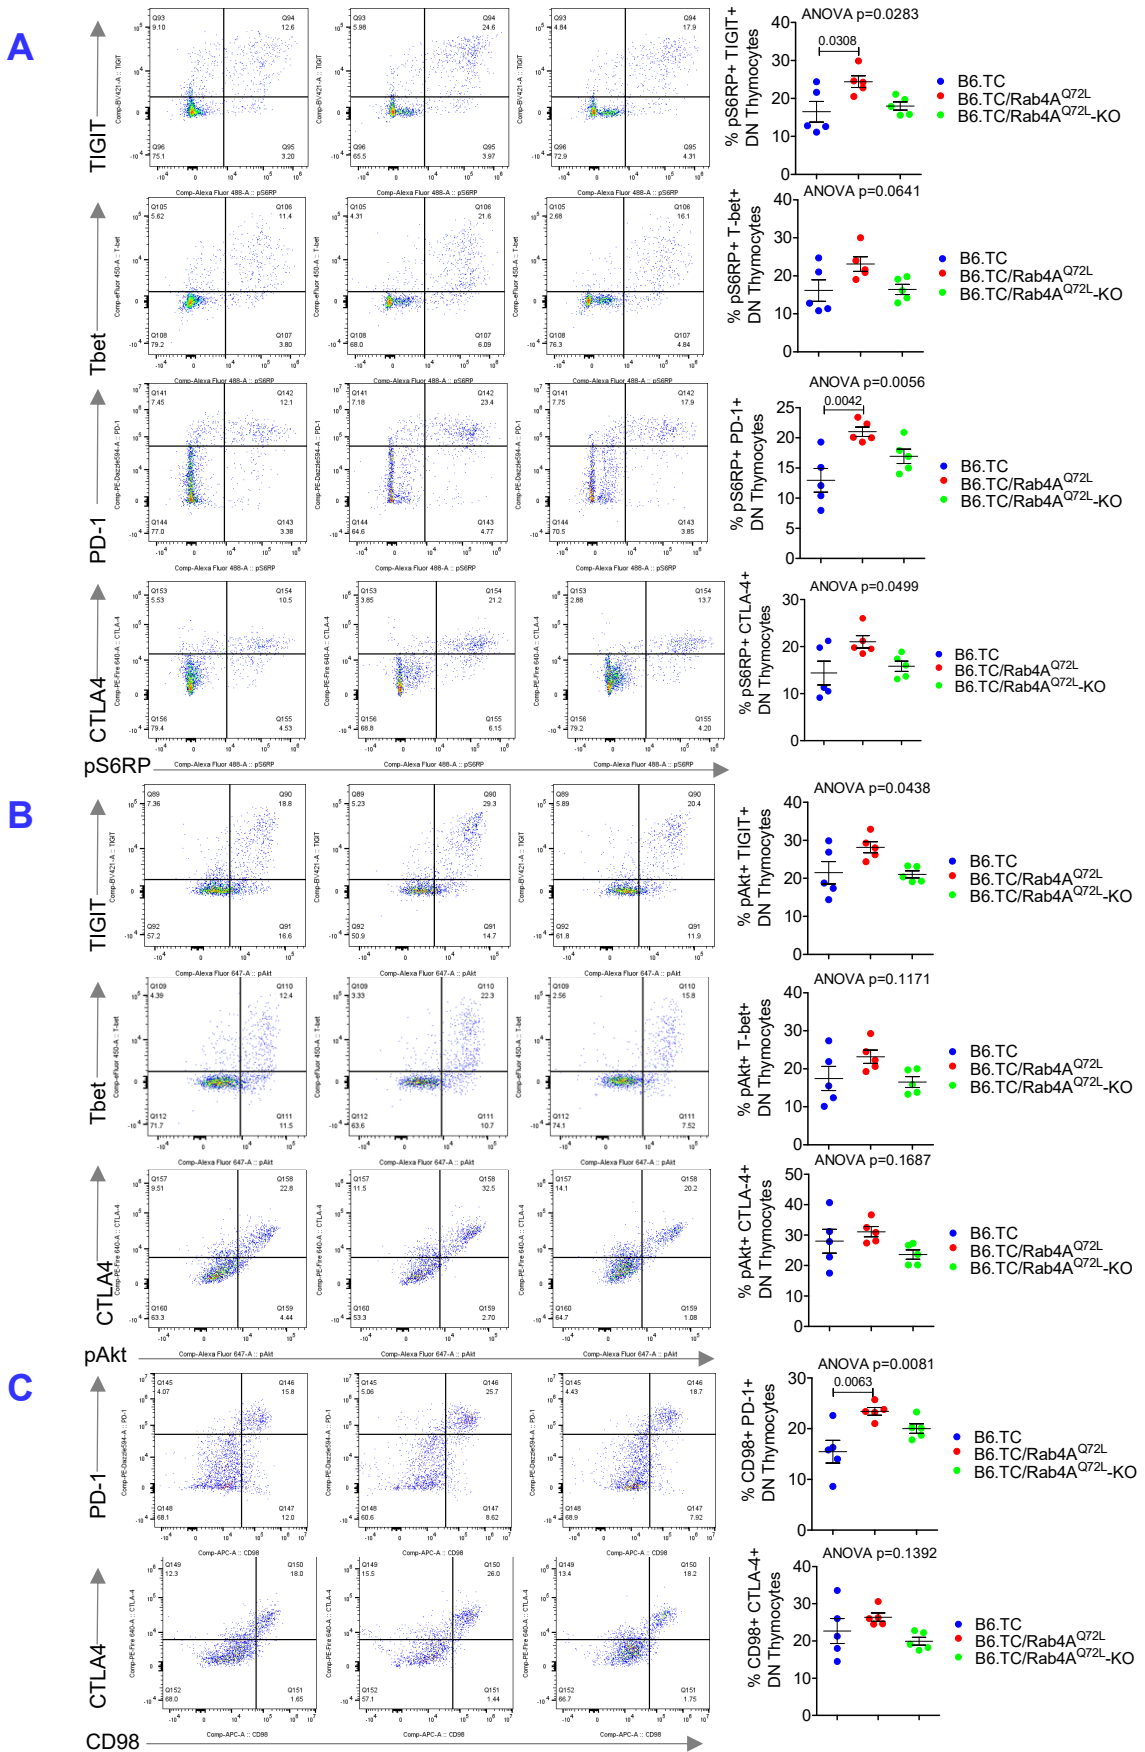

**Figure S10. Coordinate impact by Rab4A on markers of exhaustion, activation of mTORC1 and mTORC2, and expression of CD98 in DN T cells of B6.TC, B6.TC/Rab4A<sup>Q72L</sup>, and B6.TC/Rab4A<sup>Q72L</sup> -KO mice.**

**A**, Markers of exhaustion, T-bet, Eomes, TIGIT, PD-1, PL-L2, and CTLA-4<sup>2</sup> were examined relative to activation of mTORC1 in DN, DP, CD4<sup>+</sup>, and CD8<sup>+</sup> SP T cells from the thymus of B6.TC, B6.TC/Rab4A<sup>Q72L</sup>, and B6.TC/Rab4A<sup>Q72L</sup> -KO mice, using five age-matched females per genotype. These mice were of 38 ± 0.6 weeks of age when B6.TC/Rab4A<sup>Q72L</sup> females already show increased inflammation, elevated autoantibody production and proteinuria (**Figure S2**). Left panel, representative flow cytometry dot plots of DN T cells. Right panel, cumulative analyses show the mean ± SE of DN T cells. Overall one-way ANOVA p values are shown in the header of each figure panel, while Tukey's post-hoc test p values < 0.05 over brackets reflect comparison between experimental groups.

**B**, Markers of exhaustion, T-bet, Eomes, TIGIT, PD-1, PL-L2, and CTLA-4<sup>2</sup> were examined relative to activation of mTORC2 activation in DN, DP, CD4<sup>+</sup>, and CD8<sup>+</sup> SP T cells from the thymus of B6.TC, B6.TC/Rab4A<sup>Q72L</sup>, and B6.TC/Rab4A<sup>Q72L</sup> -KO mice, using five age-matched females per genotype. Left panel, representative flow cytometry dot plots of DN T cells. Right panel, cumulative analyses show the mean ± SE of DN T cells. Overall one-way ANOVA p values are shown in the header of each figure panel, while Tukey's post-hoc test p values < 0.05 over brackets reflect comparison between experimental groups.

**C**, Markers of exhaustion, T-bet, Eomes, TIGIT, PD-1, PL-L2, and CTLA-4<sup>2</sup> were examined relative to CD98 expression in DN, DP, CD4<sup>+</sup>, and CD8<sup>+</sup> SP T cells from the thymus of B6.TC, B6.TC/Rab4A<sup>Q72L</sup>, and B6.TC/Rab4A<sup>Q72L</sup> -KO mice, using five age-matched females per genotype. Left panel, representative flow cytometry dot plots of DN T cells. Right panel, cumulative analyses show the mean ± SE of DN T cells. Overall one-way ANOVA p values are shown in the header of each figure panel, while Tukey's post-hoc test p values < 0.05 over brackets reflect comparison between experimental groups.

# Figure S11

**A**

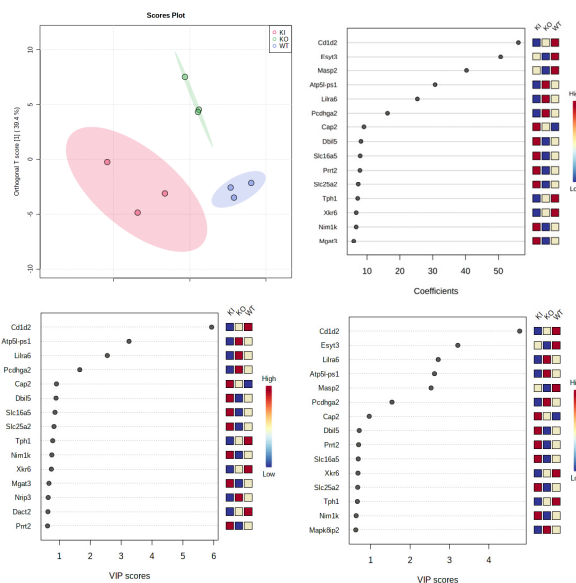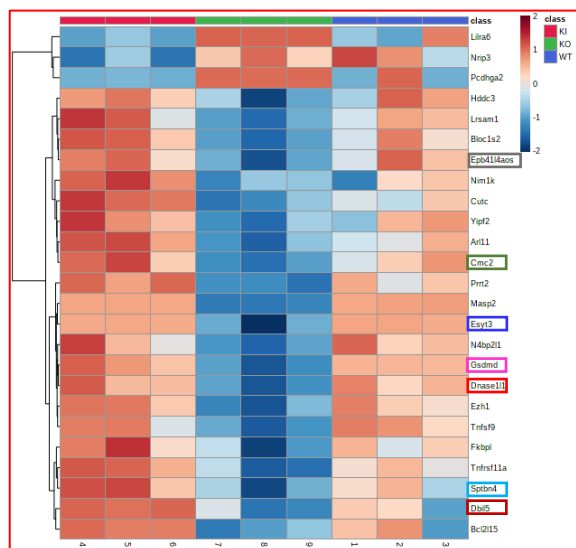

**B**

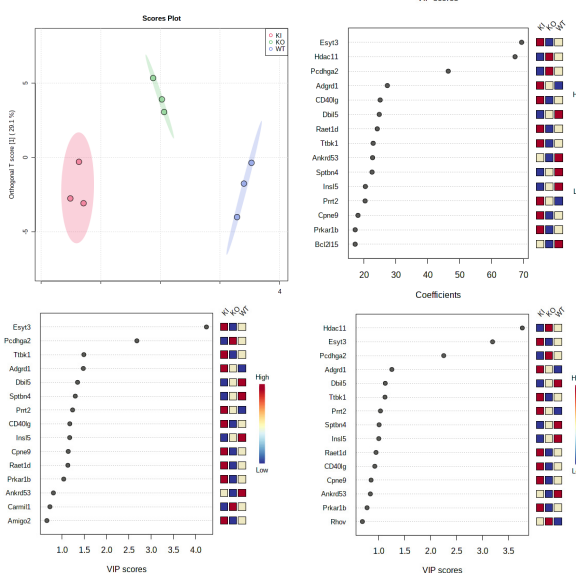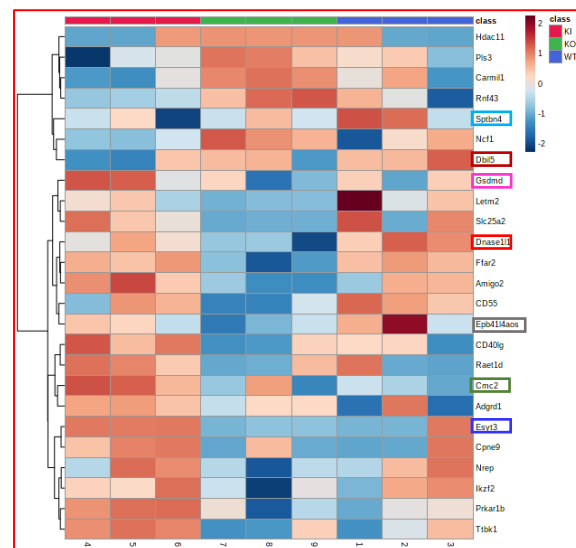

**C**

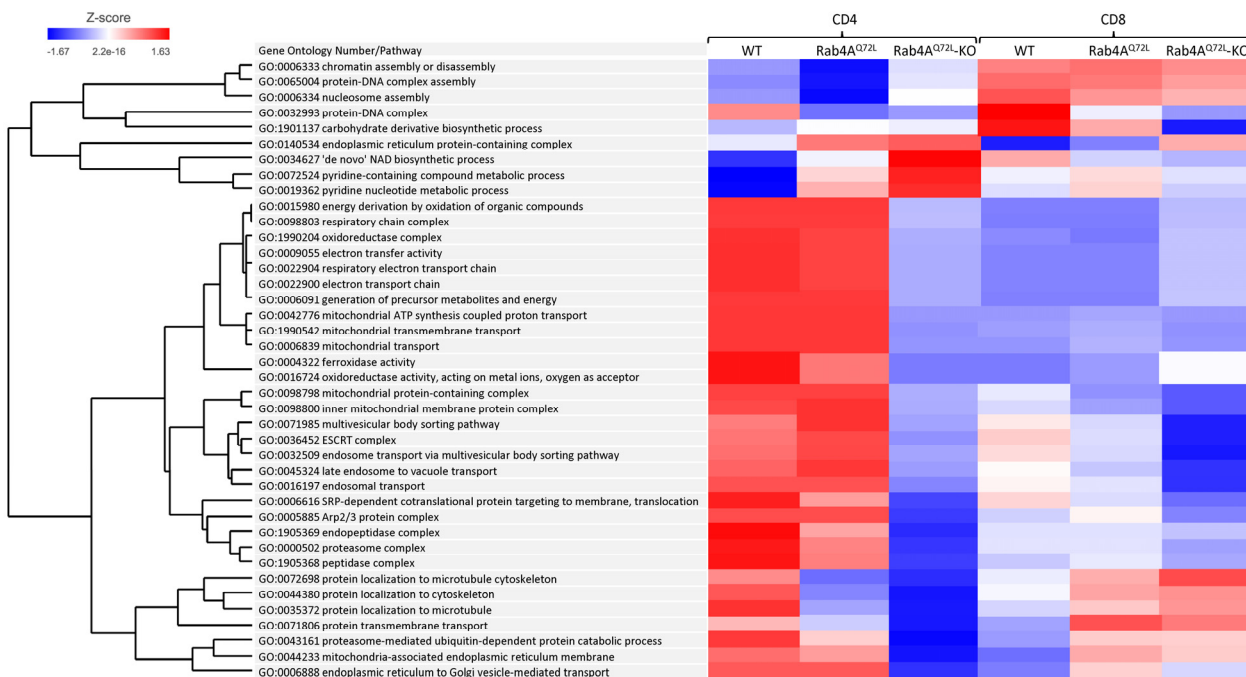

**Figure S11. Gene expression analysis by RNAseq revealed distortion of mitochondrial and endosome traffic pathways by Rab4A into opposite directions between CD4<sup>+</sup> T cells and CD8<sup>+</sup> T cells.** **A**, Discrimination of gene expression amongst CD4<sup>+</sup> T cells from B6.TC (WT), B6.TC/Rab4A<sup>Q72L</sup>(KI) and B6.TC/Rab4A<sup>Q72L</sup>-KO (KO) mice by orthogonal PLSDA analysis. Individual genes driving discrimination of two components are shown by VIP scores. Coefficient scores show 15 most impactful genes. Heat diagrams show expression of 25 genes providing discrimination by ANOVA at false discovery rate (FDR)  $p < 0.05$ . **B**, Discrimination of gene expression amongst CD8<sup>+</sup> T cells from B6.TC (WT), B6.TC/Rab4A<sup>Q72L</sup> (KI) and B6.TC/Rab4A<sup>Q72L</sup>-KO (KO) mice by orthogonal PLSDA analysis. Individual genes driving discrimination of two components are shown by VIP scores. Coefficient scores show 15 most impactful genes. Heat diagrams show expression of 25 genes providing discrimination by ANOVA at FDR  $p < 0.05$ . Genes affected by Rab4A both in CD4<sup>+</sup> and CD8<sup>+</sup> T cells are visualized by brackets with matching colors. **C**, Pathway analysis of gene expression in CD4<sup>+</sup> T cells and CD8<sup>+</sup> T cells from B6.TC (WT), B6.TC/Rab4A<sup>Q72L</sup> (KI) and B6.TC/Rab4A<sup>Q72L</sup>-KO (KO) mice. Heat diagrams show the top 40 of 12,777 pathways affected by Rab4A at FDR  $p < 0.05$  across all samples analyzed using the Partek Genomics Suite analysis software. Pathway annotations can be optimally read at 200% zoom.

Figure S12

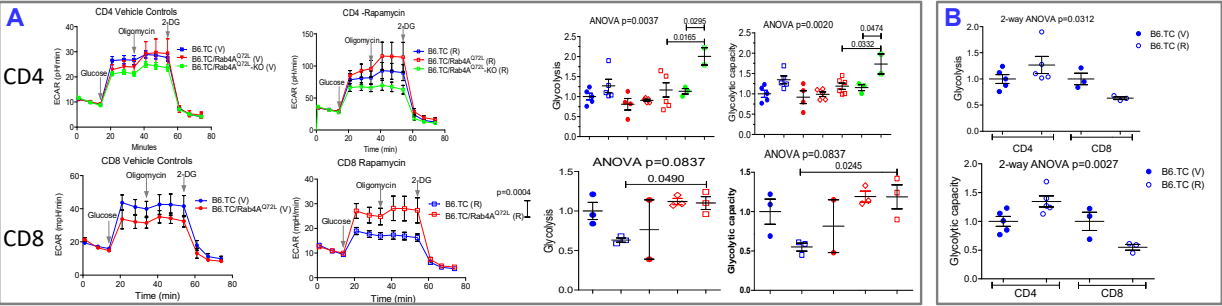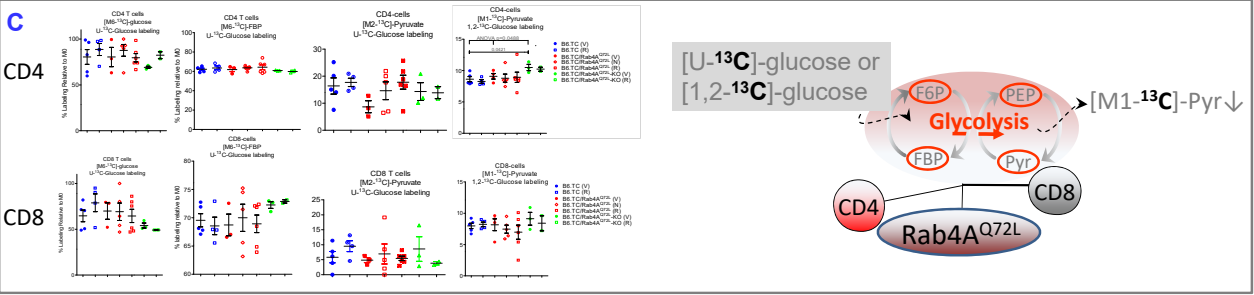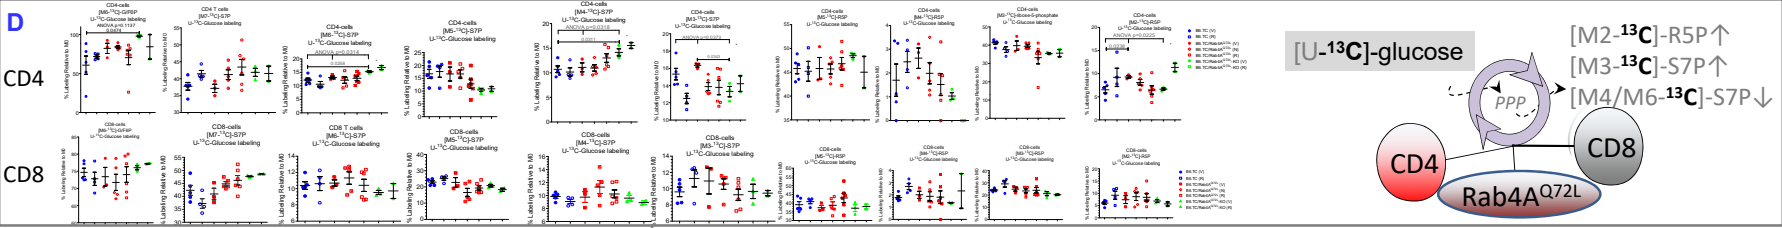

**Figure S12. The Rab4A-mTOR axis restricts metabolic flux through glycolysis and the PPP in CD4<sup>+</sup> T cells.** The impact of Rab4A activation and treatment with rapamycin and NAC on glucose metabolism in CD4<sup>+</sup> and CD8<sup>+</sup> T cells were examined following stimulation through CD3 and CD28 for 72 hours. **A**, Measurement of extracellular acidification rate (ECAR, mpH/min) in CD4<sup>+</sup> and CD8<sup>+</sup> T cells by using a Seahorse Metabolic Analyzer. ECAR levels of B6.TC, B6.TC/Rab4A<sup>Q72L</sup> and B6.TC/Rab4A<sup>Q72L</sup>-KO mice were compared in mice treated with 0.2% CMC (Vehicle panel) or rapamycin dissolved in 0.2% CMC (Rapamycin panel). Dot plot charts reflect mean  $\pm$  SE of cumulative analyses of glycolysis and glycolytic capacity. Overall one-way ANOVA p values are shown in the header of each figure panel, while Sidak's post-hoc test p values < 0.05 over brackets reflect comparison between experimental groups. Due to limited availability of cells, the scope of studies was constrained in CD8 T cells. **B**, Opposing effects of rapamycin on glycolysis in CD4<sup>+</sup> and CD8<sup>+</sup> T cells of B6.TC mice. Statistical analyses were done by two-way ANOVA. **C**, Assessment of metabolic flux through glycolysis in CD4<sup>+</sup> and CD8<sup>+</sup> T cells stimulated via CD3 and CD28 for 72 hours and labelled with [U-<sup>13</sup>C]-glucose or [1,2-<sup>13</sup>C]-glucose stable isotope tracer for analysis by high-resolution LC-MS/MS. Overall one-way ANOVA p values are shown in the header of each figure panel, while Tukey's post-hoc test p values < 0.05 over brackets reflect comparison between experimental groups. **D**, Assessment of [U-<sup>13</sup>C]-glucose flux through the PPP in CD4<sup>+</sup> and CD8<sup>+</sup> T cells. Overall one-way ANOVA p values are shown in the header of each figure panel, while Tukey's post-hoc test p values < 0.05 over brackets reflect comparison between experimental groups.

**Figure S13**

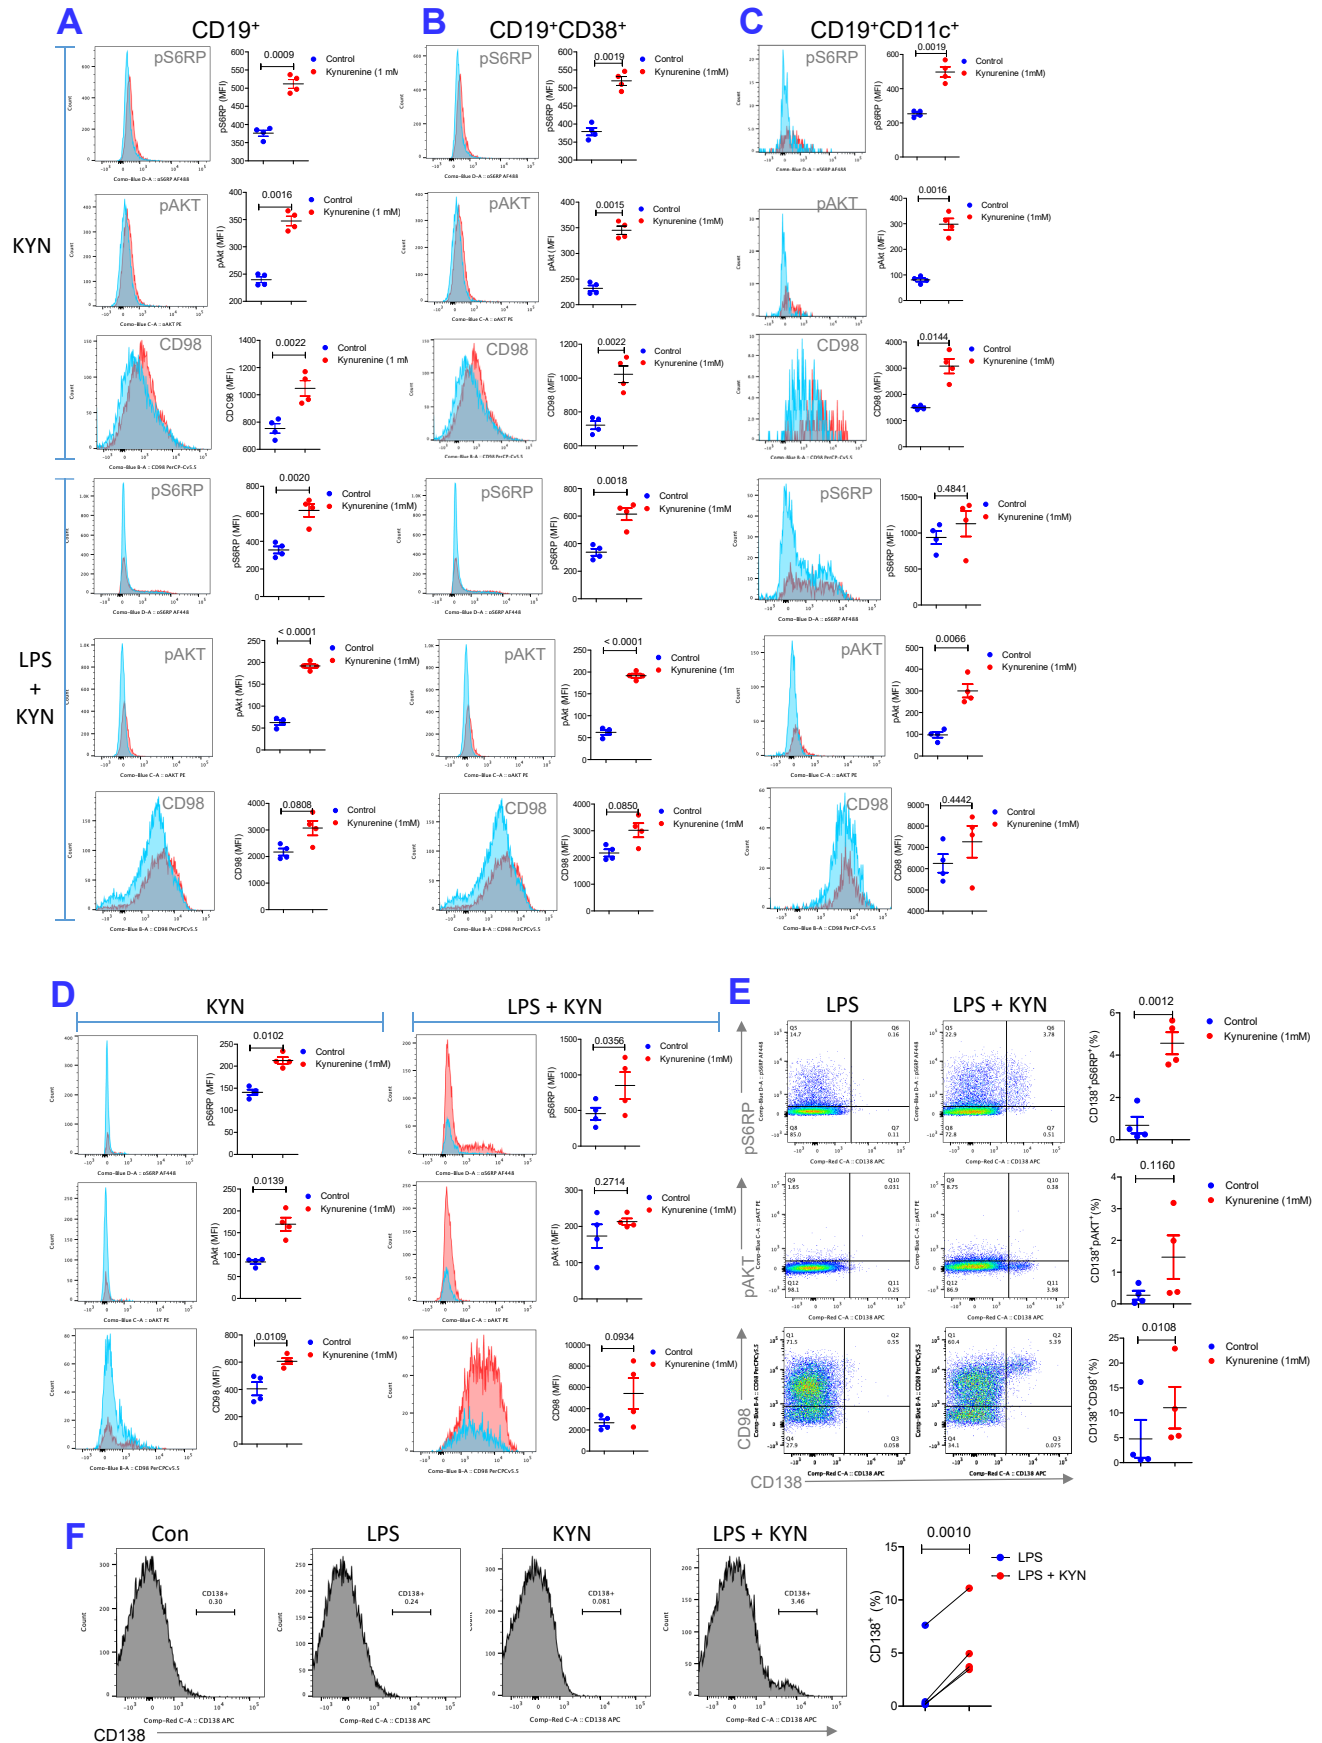



**Figure S13. Effect of kynurenine (KYN) on activation of mTORC1 and mTORC2 and expression of CD98 in CD19<sup>+</sup> B cells.** Splenocytes from female B6 mice were stimulated with 1 mM kynurenine alone or together with CD3/CD28 or LPS for 72 hours in vitro, as indicated for each panel. Following staining for surface expression of CD3, CD4, CD8, CD11c, CD19, CD38, CD138, and CD98, cells were fixed and permeabilized and activities of mTORC1 and mTORC2 were measured by intracellular staining for pS6RP and pAkt, respectively.

**A,** Effect of KYN with and without concurrent LPS stimulation on mTORC1 and mTORC2 activities and CD98 expression in CD19<sup>+</sup> B cells. Representative flow cytometry histograms and Graphpad charts with mean  $\pm$  SE of four independent experiments are shown. Brackets represent p values  $< 0.05$  by comparison using two-tailed paired t-test. **B,** Effect of KYN with and without concurrent LPS stimulation on mTORC1 and mTORC2 activities and CD98 expression in CD19<sup>+</sup>CD38<sup>+</sup> B cells. Representative flow cytometry histograms and Graphpad charts with mean  $\pm$  SE of four independent experiments are shown. Brackets represent p values  $< 0.05$  by comparison using two-tailed paired t-test. **C,** Effect of KYN with and without concurrent LPS stimulation on mTORC1 and mTORC2 activities and CD98 expression in CD19<sup>+</sup> CD11c<sup>+</sup> B cells. Representative flow cytometry histograms and Graphpad charts with mean  $\pm$  SE of four independent experiments are shown. Brackets represent p values  $< 0.05$  by comparison using two-tailed paired t-test. **D,** Effect of KYN with and without concurrent LPS stimulation on mTORC1 and mTORC2 activities and CD98 expression in CD138<sup>+</sup> plasma cells. Representative flow cytometry histograms and Graphpad charts with mean  $\pm$  SE of four independent experiments are shown. Brackets represent p values  $< 0.05$  by comparison using two-tailed paired t-test. **E,** Effect of KYN with and without concurrent LPS stimulation on mTORC1 and mTORC2 activities relative to CD138<sup>+</sup> expression. Representative flow cytometry dot plots and Graphpad charts with mean  $\pm$  SE of four independent experiments are shown. Brackets represent p values  $< 0.05$  by comparison using two-tailed paired t-test. **F,** Effect of KYN with and without concurrent

LPS stimulation on prevalence of CD138<sup>+</sup> plasma cells. Representative flow cytometry histograms and Graphpad charts with mean  $\pm$  SE of four independent experiments are shown. Brackets represent p values  $< 0.05$  by comparison using two-tailed paired t-test.

# Figure S14

6/28/2022 HeLa CD98 knockdown

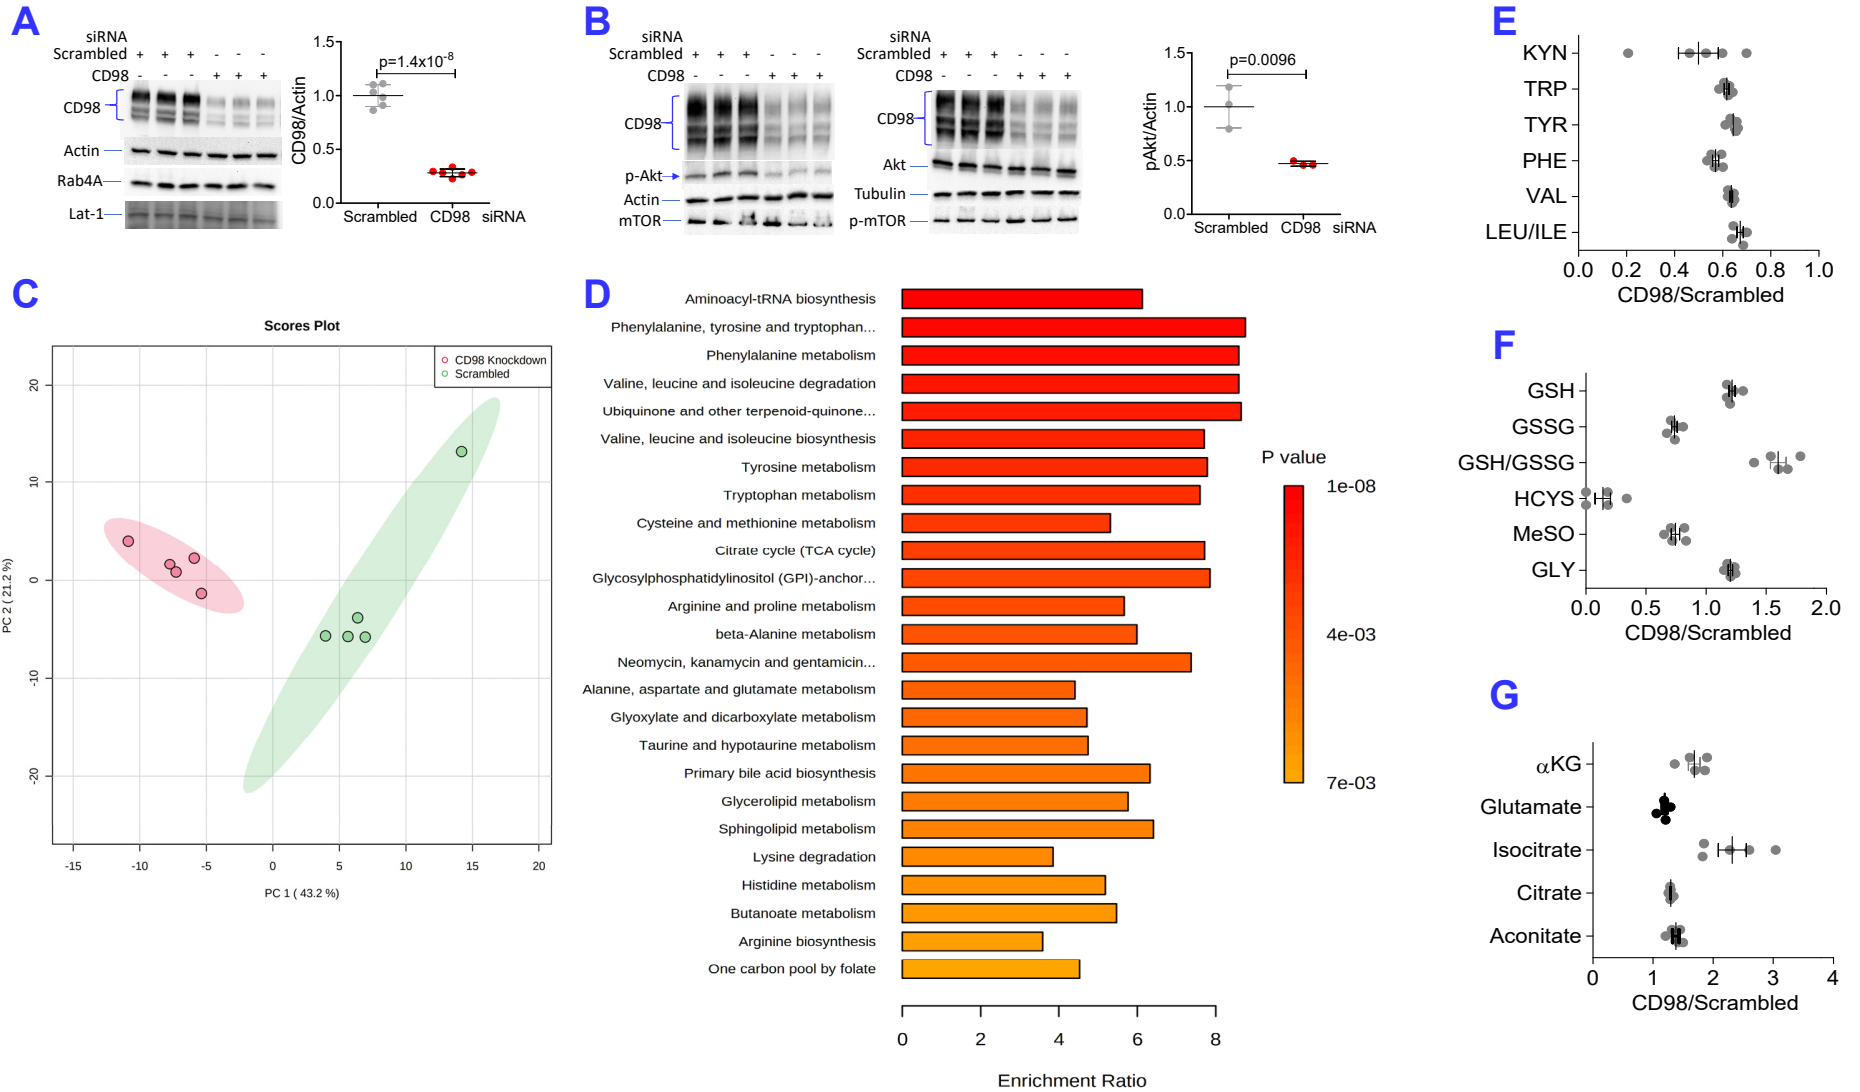

**Figure S14. CD98 expression controls intracellular levels of branched and aromatic amino acids and kynurenine.** **A**, Knockdown of CD98 expression by siRNA in HeLa cells.

Left panel indicates representative western blot detection of CD98 and LAT1 protein levels relative to  $\beta$ -actin. Right panel indicates cumulative analysis of 5 replicate experiments, showing knockdown of CD98.  $p < 0.05$  represents unpaired two-tailed t-test. **B**, Left panel, representative western blot detection of pAkt and mTOR protein levels upon CD98 knockdown; Middle panel, representative western blot detection of Akt and p-mTOR protein levels upon CD98 knockdown; Right panel, cumulative analysis of pAkt/actin levels upon siRNA-mediated knockdown of CD98.  $p < 0.05$  represents unpaired two-tailed t-test. **C**, Principal component analysis of the effect of CD98 knockdown on the metabolome using Metaboanalyst 5.0, **D**, Effect of CD98 knockdown of metabolic pathways. 25 of 84 KEGG pathways affected at FDR  $p < 0.05$  are displayed. **E**, Effect of siRNA-mediated CD98 knockdown on intracellular levels of branched chain (VAL, LEU/ILE) and aromatic amino acids (PHE, TYR, TRP) and KYN levels relative to scrambled siRNA control. Changes are all significant at  $p < 0.05$  using unpaired two-tailed t-test. **F**, Effect of CD98 knockdown on intracellular levels of GSH, GSSG, GSH/GSSG ratio, methionine sulfoxide (MeSO), and homocysteine (HCYS). Data represent the effect of CD98 siRNA relative to scrambled siRNA control in 5 replicate experiments. Changes are all significant at  $p < 0.05$  using unpaired two-tailed t-test. **G**, Effect of CD98 knockdown on intracellular levels of TCA metabolites,  $\alpha$ KG, glutamate, citrate, isocitrate, aconitate. Data represent the effect of CD98 siRNA relative to scrambled siRNA control in 5 replicate experiments. Changes are significant at  $p < 0.05$  using unpaired two-tailed t-test.

Figure S15

A

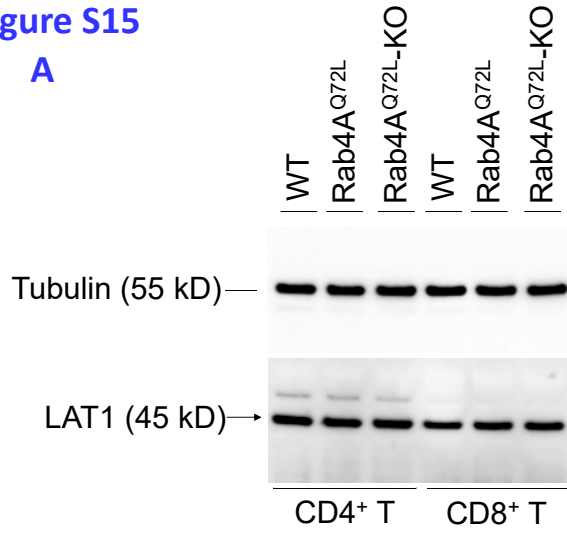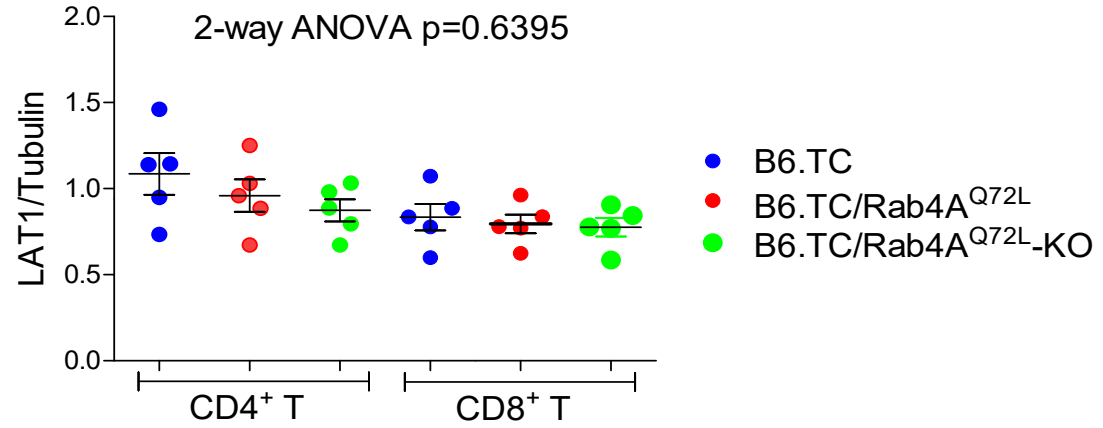

B

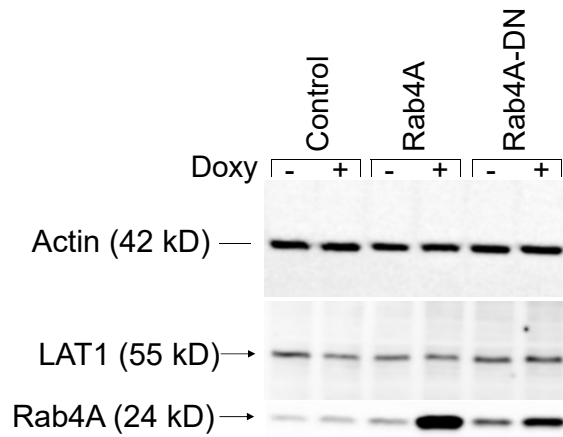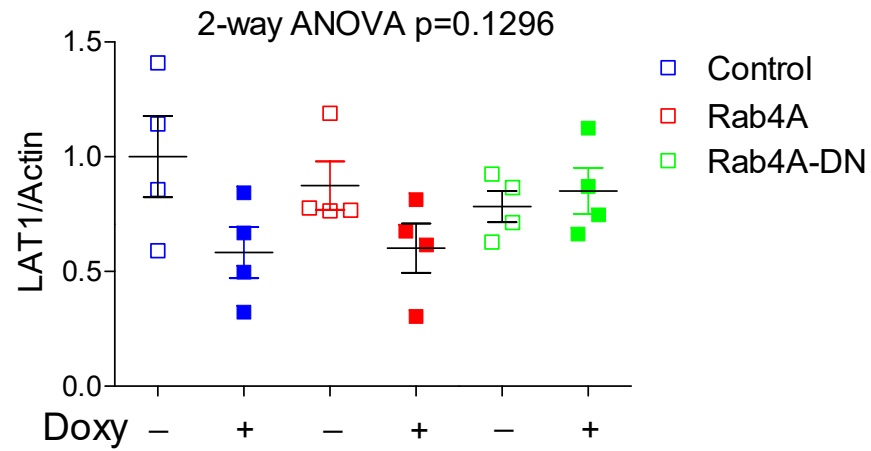

**Figure S15. Lack of impact by Rab4A on the expression of LAT1 in CD4<sup>+</sup> or CD8<sup>+</sup> T cells of age-matched female B6.TC, B6.TC/Rab4A<sup>Q72L</sup>, and B6.TC/Rab4A<sup>Q72L</sup> -KO mice or in Jurkat human CD4<sup>+</sup> T cells.** LAT1 is a transmembrane protein <sup>2,3</sup>, and thus its expression can be reliably detected by western blot analysis. Since mouse (45 kD) and human LAT1 (55 kD) migrate at different molecular weights,  $\alpha$ -tubulin and  $\beta$ -actin were used as loading controls. **A**, Western blot analysis of LAT1 protein levels in CD4<sup>+</sup> and CD8<sup>+</sup> T cells of age-matched female B6.TC, B6.TC/Rab4A<sup>Q72L</sup>, and B6.TC/Rab4A<sup>Q72L</sup> -KO mice. Left panel, representative western blots; right panel, cumulative analysis. Overall two-way ANOVA p values are shown in the header of each figure panel, while Tukey's post-hoc test p values < 0.05 over brackets reflect comparison between experimental groups. **B**, Western blot analysis of LAT1 protein levels in Jurkat human CD4<sup>+</sup> T cell lines with altered expression of Rab4A. Left panel, representative western blots; right panel, cumulative analysis of four replicate experiments. Overall two-way ANOVA p values are shown in the header of each figure panel, while Tukey's post-hoc test p values < 0.05 over brackets reflect comparison between experimental groups.

Figure S16

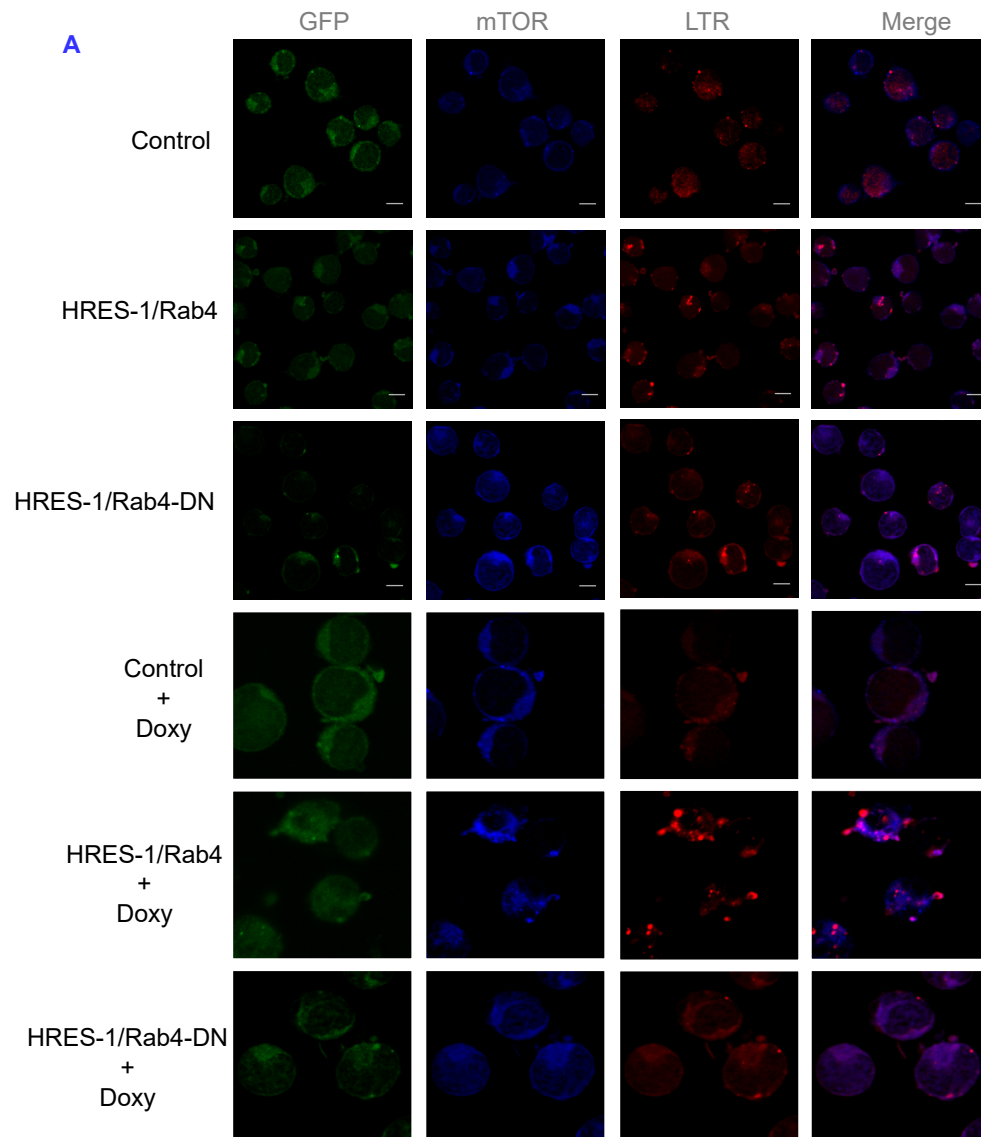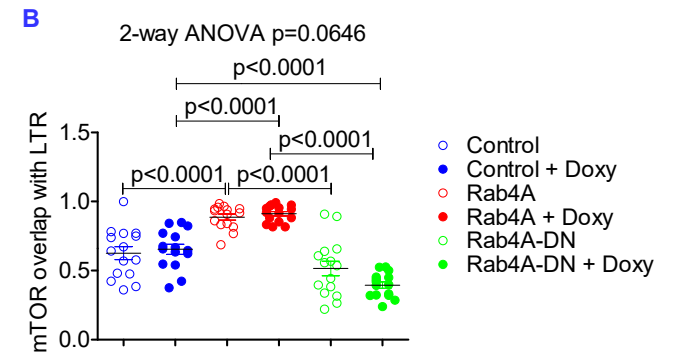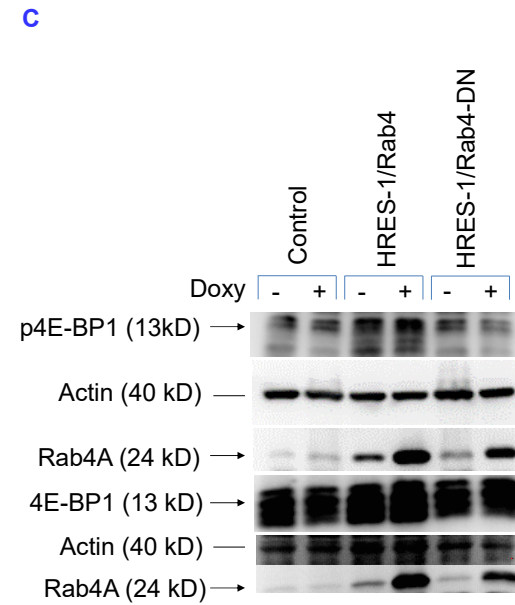

**Figure S16. Effect of Rab4 on lysosomal traffic and activation of mTOR in Jurkat cells carrying AAV expression vector expressing green fluorescent protein (GFP) alone (Control) or wild-type or dominant-negative Rab4A<sup>S27N</sup> (DN) Rab4A expressed from an open reading frame upstream of that of GFP. Cells were cultured with or without 1 ug/ml of doxycycline (Doxy).** **A**, Representative confocal immunofluorescence microscopy images showing expression of GFP (green), mTOR (blue), and lysotracker red (LTR; red). **B**, Cumulative analysis of mTOR co-localization with LTR. Data points represent individuals cells analyzed in four independent experiments. Overall two-way ANOVA p values are shown in the header of each figure panel, while Tukey's post-hoc test p values < 0.05 over brackets reflect comparison between experimental groups. **C**, Western blot analysis of mTOR activity measured via phosphorylation of 4E-BP1. Wild-type Rab4A promoted mTOR activation, whereas dominant-negative Rab4A<sup>S27N</sup> had the opposite effect. Expression of Rab4 and Rab4A<sup>S27N</sup> by AAV vectors was moderately enhanced in the absence of doxycycline, which was attributed to leakage of the inducible promoter.



**Figure S17**

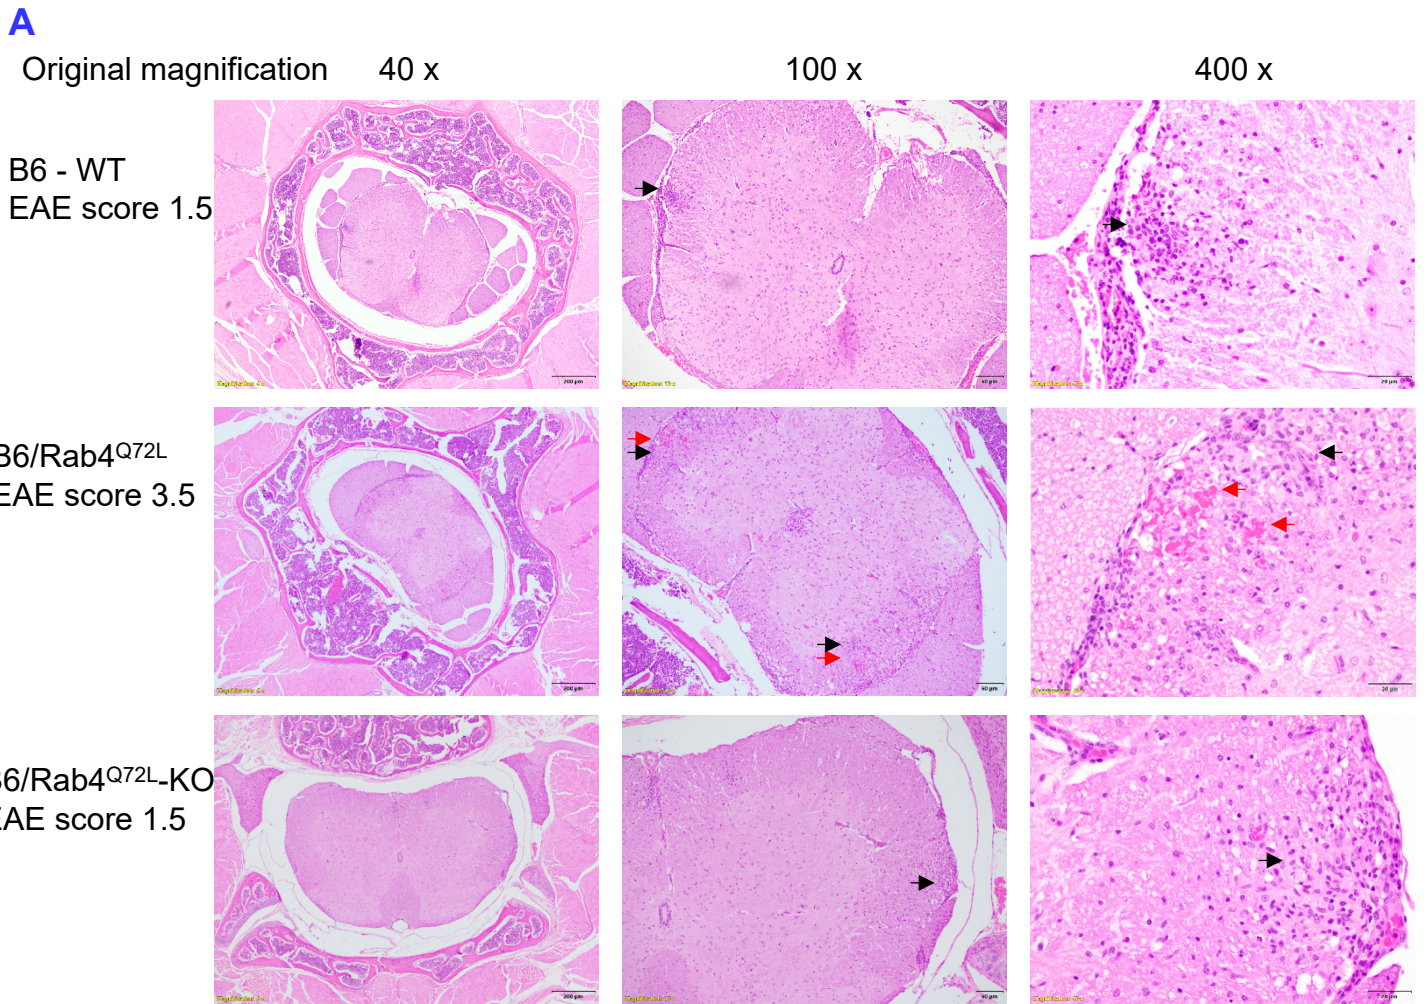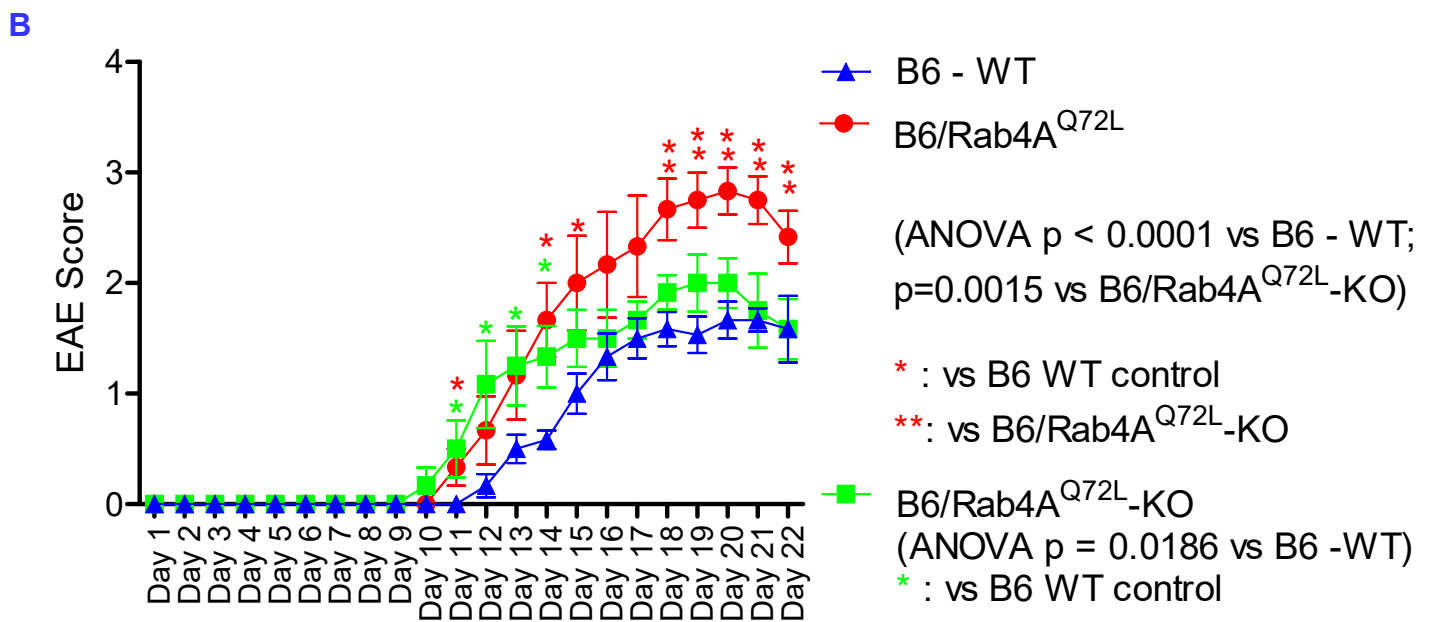

**Figure S17. Effect of Rab4A on MOG-induced EAE.** For MOG<sub>35-55</sub>-induced EAE, 10- to 12-wk-old female mice were immunized s.c. with 200  $\mu$ l of an emulsion containing 800  $\mu$ g of *Mycobacterium tuberculosis* H37Ra (Difco, Detroit, MI) and 200  $\mu$ g MOG<sub>35-55</sub> distributed over three spots on the flank. Each mouse additionally received 200 ng pertussis toxin (PTx) (List Biological Laboratories, Campbell, CA) in 200  $\mu$ l PBS i.p. on days 0 and 2 post immunization. **A**, Clinical scores of EAE. The data are plotted as the mean daily clinical score for all animals in a particular experimental group. The effect of genotypes were compared by repeated measures 2-way ANOVA: B6/Rab4A<sup>Q72L</sup> vs WT,  $p < 0.0001$ ; B6/Rab4A<sup>Q72L</sup>-KO vs WT,  $p = 0.0186$ ; B6/Rab4A<sup>Q72L</sup> vs B6/Rab4A<sup>Q72L</sup>-KO,  $p = 0.0015$ . Comparisons were also made at each time points using two-t-test, asterisks reflect  $p < 0.05$ . **B**, Spinal cord sections of mice immunized with MOG<sub>35-55</sub> peptides. Spinal cords were stained with hematoxylin-eosin upon termination of experiment. Inflammatory infiltrates and intra-parenchymal hemorrhage are marked by black and red arrows, respectively. Magnification of original objectives and scale bars are embedded into each image using Olympus CellSense software.

Figure S18

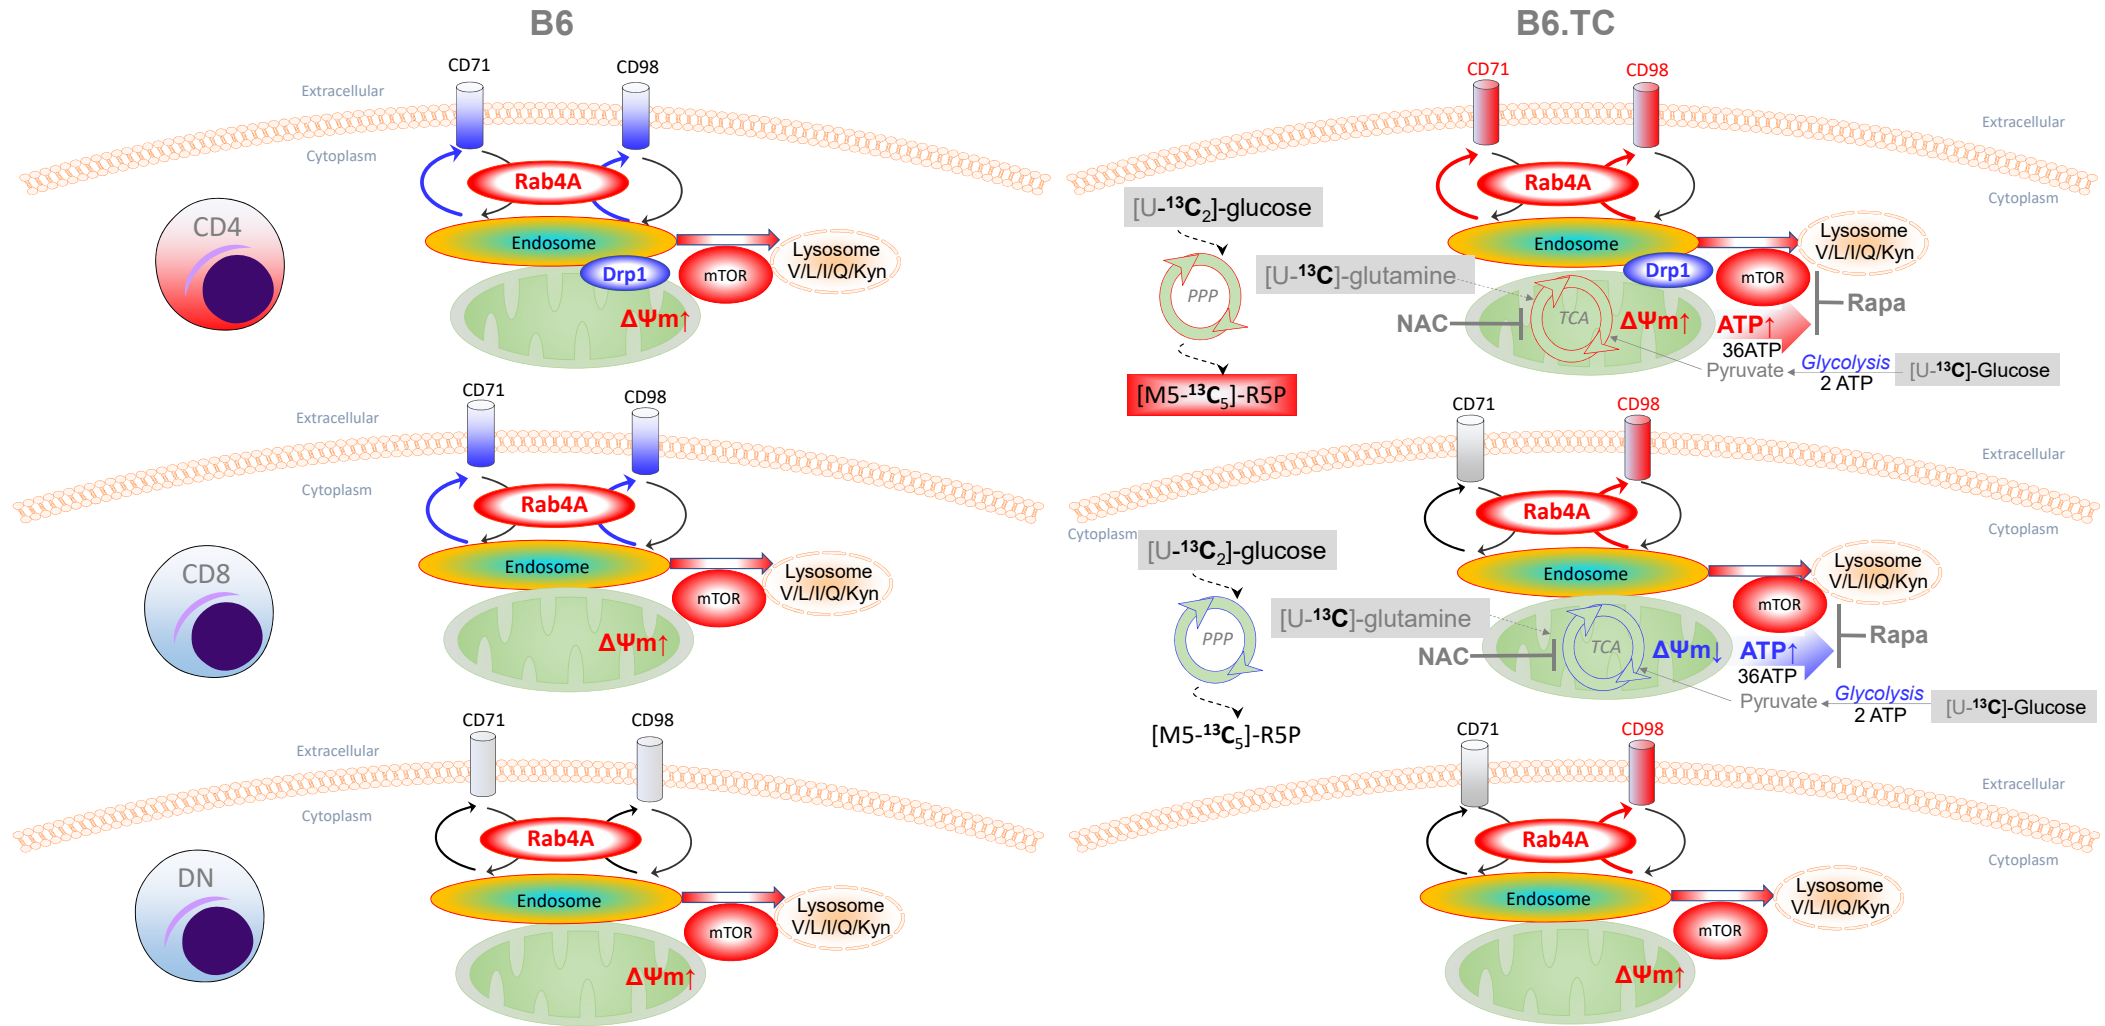

**Figure S18. Rab4A-directed endosome traffic exerts cell-type specific control of mitochondrial metabolism via regulation of Drp1-mediated mitophagy, CD98 expression, and lysosomal localization of mTOR.** 1) Rab4A elicits the depletion of mitophagy-initiator Drp1, and causes the accumulation of mitochondria in CD4 T cells of B6/Rab4A<sup>Q72L</sup> mice and B6.TC/Rab4A<sup>Q72L</sup> mice. Increased mitochondrial metabolism and metabolic flux through the TCA cycle is coupled with enhanced ATP production and increased metabolic flux through the PPP, which generates R5P, an essential precursor of *de novo* nucleotide biosynthesis. 2) Rab4A and SLE synergistically enhance the endocytic recycling of CD98, activate mTOR, and promote the expansion of CD4<sup>+</sup> T cells in B6.TC/Rab4A<sup>Q72L</sup> mice carrying constitutively active Rab4A alleles. CD98 mediates the uptake of KYN, which accumulates in CD8<sup>+</sup> T cells and sera of B6.TC/Rab4A<sup>Q72L</sup> mice and spreads mTOR activation to B cells and plasma cells. Inactivation of Rab4A in T cells blocks receptor recycling, mTOR activation, expansion of DN T cells, ABCs, and plasma cells, and GN in B6.TC/Rab4A<sup>Q72L</sup>-KO mice. 3) Rab4A promotes the localization of mTOR to lysosomes. Pharmacological mTOR blockade with rapamycin and NAC abrogated CD98 expression, mTOR activation, and GN in B6.TC/Rab4A<sup>Q72L</sup> mice.

Figure S19

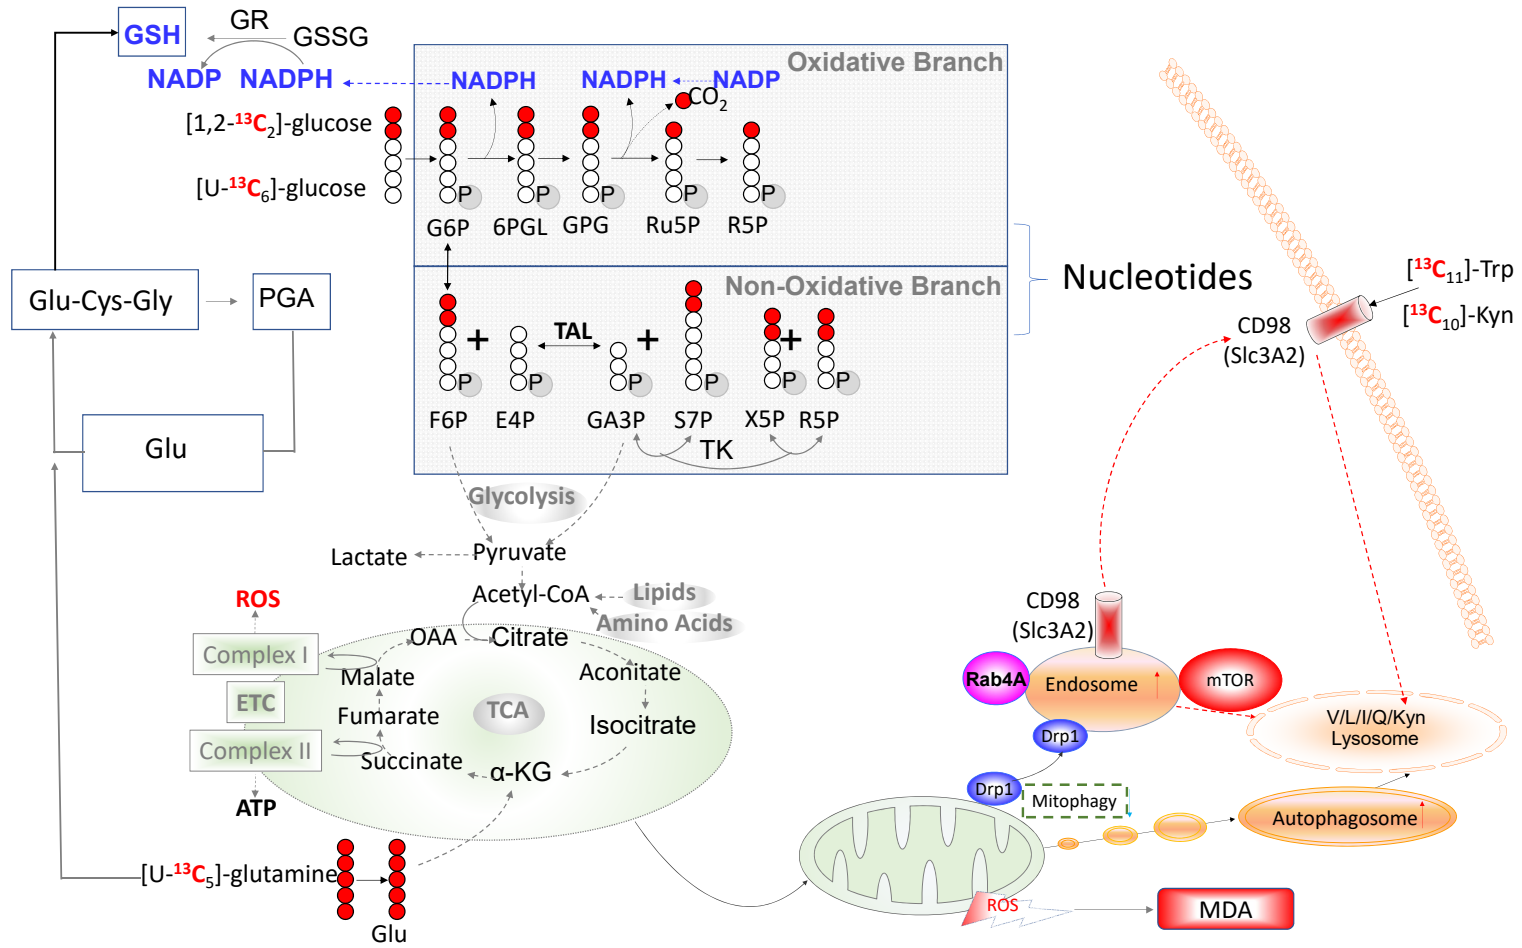



**Figure S19. Schematic diagram of metabolic flux analyses through the pentose phosphate pathway (PPP), glycolysis, and the mitochondrial tricarboxylic acid (TCA) cycle.**

Deuterated hydrogen ( $^2\text{H}$ ) and carbon-13  $^{13}\text{C}$  atoms within the stable isotope-labelled compounds are marked in blue and red, respectively. We monitored the transfer of  $^2\text{H}$  from [1- $^2\text{H}$ ]-glucose and [3- $^2\text{H}$ ]-glucose by PPP enzyme G6PD and 6PGD into NADPH, traced  $^{13}\text{C}$  from [1,2- $^{13}\text{C}$ ]-glucose and [U- $^{13}\text{C}$ ]-glucose through the oxidative and non-oxidative branches of the PPP and glycolysis, and tracked  $^{13}\text{C}$  from [U- $^{13}\text{C}$ ]-glutamine through the mitochondrial TCA cycle.

Connections of metabolic flux are illustrated with antioxidant defenses such as regeneration of GSH from its oxidized form GSSG, neutralization of lipid peroxides, such as 4-hydroxynonenal (4-HNE), and the accumulation of oxidative stress-generating mitochondria and mTOR activation in  $\text{CD4}^+$  T cells of lupus-prone B6.TC/Rab4A<sup>Q72L</sup> mice.

## SUPPLEMENTARY REFERENCES

1. Lee,P.P. *et al.* A Critical Role for Dnmt1 and DNA Methylation in T Cell Development, Function, and Survival. *Immunity* **15**, 763-774 (2001).
2. Saito,Y. & Soga,T. Amino acid transporters as emerging therapeutic targets in cancer. *Cancer Sci.* **112**, 2958-2965 (2021).
3. Scalise,M., Galluccio,M., Console,L., Pochini,L., & Indiveri,C. The Human SLC7A5 (LAT1): The Intriguing Histidine/Large Neutral Amino Acid Transporter and Its Relevance to Human Health. *Front. Chem.* **6**, 243 (2018).
